1 **Differential Interaction between RAC/ROP-GTPases and RIC-Effectors: A**  
2 **Network Hub for Broader Signal Transduction in Pollen Tubes**

3  
4

5 **Octavian O. H. Stephan**

6

7 Department of Biology, Friedrich-Alexander University of Erlangen-Nuremberg, Erlangen,  
8 Bavaria 91058, Germany.

9

10 Corresponding author's e-mail address: [octavian.stephan@fau.de](mailto:octavian.stephan@fau.de)

11

12

13

14

15

16

17 **RUNNING TITLE:**

18 RIC11 a Broader Signal Transduction Hub

19

20

21

22

23 **KEYWORDS:**

24 CAR4, cell growth, CRIB, GAP, growth regulators, GTPase-effectors, molecular network hubs,  
25 *Nicotiana tabacum*, polar growth, pollen, pollen tubes, protein interactions, RAC/ROP-GTPases,  
26 RAC-effector, RAC1, RAC3, RAC5, RIC11, signal transduction, signalling networks,

27

28

29

30

31

32

33

34

35 **ABSTRACT**

36 To date knowledge about plant RAC/ROP-GTPase effectors and downstream targets is still limited.  
37 This work aims on elucidation of related signal transduction networks involved in pollen tube growth.  
38 Yeast two-hybrid and Pull Down methodology were used to identify and characterize hitherto  
39 unknown components of RAC-related protein complexes from *Nicotiana tabacum*. Nt-RIC11pt  
40 specifically interacts with diverse active tobacco RAC-GTPases, and it is particularly significant, that  
41 their binding affinity is differential, thus implicating a multifaceted role in an interconnected RIC-  
42 RAC network. Moreover, Y2H-screening for Nt-RIC11pt targets identified Nt-CAR4, which is  
43 phylogenetically assigned to a multifaceted family of novel unusual GTPase activating proteins  
44 (GAP). It is argued that scaffold Nt-RIC11pt connects active Nt-RAC3 with membrane-bound Nt-  
45 CAR4, thus relaying GAP-activity. Quantitative RT-PCR demonstrates Nt-RIC11pt is primarily  
46 expressed in pollen and YFP-fusion proteins show homogeneous cytoplasmic localization in growing  
47 tubes, what builds the prerequisite for a proposed role in broader signal transduction. By synoptically  
48 integrating experimental data, bioinformatic sequence comparison, phylogenetic analyses, and detailed  
49 literature review, this study hypothesizes a concept in which RIC-effectors collectively constitute a  
50 multifaceted network hub linking diverse GTPase-dependent processes.

51  
52  
53  
54  
55  
56  
57  
58  
59  
60  
61  
62  
63  
64  
65  
66  
67  
68

## 69 1. INTRODUCTION

70 Eukaryotic GTP-binding proteins of the Ras superfamily of monomeric small GTPases are essential  
71 molecular switches in signal transduction events participating in a variety of physiological processes, such as  
72 establishment of cell polarity, cell growth, morphogenesis, and hormone responses (Hakoshima et al., 2003;  
73 Kahn et al., 1992; Wennerberg et al., 2005). In species of fungi and animals this Ras superfamily comprises five  
74 families, namely RAS, RHO, RAB/YPT, ARF, and RAN, whereas plants have four families as to date no RAS-  
75 GTPases could be identified (Kahn et al., 1992; Vernoud et al., 2003; Wennerberg et al., 2005; Winge et al.,  
76 1997). The members of each family have been described to be involved in specific cellular events, in particular,  
77 RHO-GTPases control actin reorganization, cell polarity, and cell cycle (Boueux et al., 2007; Hodge and  
78 Ridley, 2016; Narumiya and Thumkeo, 2018), while RAB and ARF-GTPases regulate distinct steps of vesicular  
79 transport and endomembrane protein trafficking (Kjos et al., 2018; Memon, 2004; Pfeffer, 2017). Additionally,  
80 the RAN family is related to nucleocytoplasmic transport of RNA and proteins, as well as to mitotic spindle  
81 formation (Matsuura, 2016; Zhang and Dawe, 2011).

82 In contrast to yeast and mammals, which have three subfamilies of RHO-GTPases (Cdc42, Rac, and  
83 Rho), plants specifically possess a single subfamily of Rho small GTP-binding proteins termed Rho-like  
84 GTPases of plants (ROP), also often named as RACs based on their sequence similarities with human Rac-  
85 GTPases (Brembu et al., 2006; Feiguelman et al., 2018; Sormo et al., 2006; Winge et al., 2000; Yang, 2002;  
86 Zheng and Yang, 2000). Phylogenetic analysis shows that ROPs divided into two distinct evolutionary  
87 populations of which one apparently has evolved exclusively in vascular plants (Winge et al., 2000). Moreover,  
88 according to sequence similarities all Arabidopsis ROPs are phylogenetically classified into four subgroups with  
89 different functions (Gu et al., 2004; Yang, 2002).

90 Plant RAC/ROP-GTPases are localized in distinct specific subdomains of the plasma membrane and  
91 have been identified as central conductors spatially regulating diverse cellular tasks, such as actin cytoskeleton  
92 organization and endomembrane transport (Feiguelman et al., 2018; Kost, 2008). RAC/ROPs perform their  
93 regulatory function by switching between GTP- and GDP-bound states what facilitates transient interactions  
94 with effectors and other regulatory proteins resulting in the control of downstream signalling (Feiguelman et al.,  
95 2018; Nagawa et al., 2010). The activity state of small GTPases is spatially regulated by GDP/GTP Exchange  
96 Factors (GEFs) that facilitate ROP activation through the exchange of GDP for GTP ('on'-state), and GTPase-  
97 Activating Proteins (GAPs) that enhance the inefficient intrinsic GTP-hydrolysis activity, thereby triggering  
98 ROP conformation to the 'off'-state (Berken and Wittinghofer, 2008; Gu et al., 2006; Moon and Zheng, 2003;  
99 Shichrur and Yalovsky, 2006; Wu et al., 2000).

100 The sequence of some downstream RAC/ROP-binding effector proteins contains a highly conserved  
101 CRIB-domain (Cdc42/Rac-interactive binding), which is required for their specific interaction with GTP-bound  
102 activated RAC/ROP (Wu et al., 2001).

103 In addition, CRIB-domains are also found in other RAC/ROP interacting regulatory proteins, such as  
104 GAPs or GEFs (Borg et al., 1999; Wu et al., 2000). Whereby the CRIB-domain of classical ROP-GAPs is  
105 necessary for both, effective binding to ROP and for enhancing ROP-activity (Klahre and Kost, 2006; Schaefer  
106 et al., 2011; Wu et al., 2000).

107 Several RAC/ROP-effectors have been identified (Nagawa et al., 2010), such as ICR/RIP proteins (Interactor of  
108 constitutively active ROP/ ROP-interactive Partner)(Hazak et al., 2010; Hazak et al., 2014; Lavy et al., 2007; Li  
109 et al., 2008) and different types of RIC proteins (ROP interacting CRIB-motif containing proteins) (Bascom et

110 al., 2019; Gu et al., 2005; Wu et al., 2001). Apart from ICR/RIPs and RICs, some other effector proteins have  
111 been identified, such as ABI, RBK, RISAP, and TOR, which are related to ABA-signalling, pathogen response,  
112 pollen tube growth, and auxine response (Li et al., 2012a; Li et al., 2012b; Molendijk et al., 2008; Schepetilnikov  
113 et al., 2017; Stephan et al., 2014). Interestingly, these types of effectors do not depend on a CRIB-domain to  
114 interact with RAC/ROP-GTPases.

115 ROP-effectors of the ICR/RIP-family in Arabidopsis act as scaffolds, as for instance ICR1/RIP1 (Hazak  
116 et al., 2010; Hazak et al., 2014; Lavy et al., 2007; Li et al., 2008), which connects ROPs to the exocyst via SEC3,  
117 thus representing an auxin-modulated link between RAC/ROP-signalling, vesicle trafficking, cell polarity, and  
118 differentiation.

119 RICs are a family of proteins with relatively low molecular weight (9 - 25 KDa) that act as direct targets  
120 of active ROP-GTPases (Wu et al., 2001). In *Arabidopsis thaliana* 11 RIC genes are known (Wu et al., 2001),  
121 and for *Physcomitrella patens* only a single RIC has been described (Bascom et al., 2019), whereas up to now 7  
122 RICs have been predicted by computer analysis of *Nicotiana tabacum* DNA sequences from database. For  
123 instance, Arabidopsis ROP1 has been described to bind strongly to RIC1, RIC2, RIC4, RIC5, RIC7, RIC9, and  
124 weakly to RIC6 (Wu et al., 2001), whereby RIC4 and RIC3 act as ROP1 effectors in actin-remodelling (Gu et  
125 al., 2005). Additionally, RIC1 promotes cortical microtubule organization (Fu et al., 2005) as well as actin  
126 filament severing (Zhou et al., 2015).

127 However, Arabidopsis At-RIC11 has not been characterized, and Wu et al. (2001) state that isolation of  
128 this gene turned out to be problematic (Wu et al., 2001). Thus, the present work provides first information for the  
129 RIC11-type of effector proteins, showing that *Nicotiana tabacum* RIC11 from pollen tubes is a true interactor of  
130 active RAC/ROP-GTPases from different phylogenetic groups representing diverse cellular pathways.

131 Moreover, observations provided in the present study demonstrate that Nt-RIC11pt binds to Nt-CAR4 which is a  
132 homolog of At-GAP1 and Os-GAP1, thus it is concluded that effectors of the RIC-family do not only transmit  
133 signals to downstream targets, but Nt-RIC11pt for its part also relays feedback to RAC/ROPs by recruiting a  
134 special type of GTPase-Activating Protein (GAP) family.

135 By integrating literature study with primary research the goal of this work is to contribute novel insights into the  
136 character of plant RAC/ROP-effectors by providing a hypothesis how RICs are collectively involved in signal  
137 transduction during polar cell growth exemplary of *Nicotiana tabacum* pollen tubes.

138 While the eclectic Rho-GTPase family of humans consists of 20 members (Jaffe and Hall, 2005;  
139 Narumiya and Thumkeo, 2018; Wennerberg et al., 2005), the unique ROP-family of plants on the other hand  
140 comprises substantially less members, as for instance 4 ROPs in *Physcomitrella patens*, 7 in *Oryza sativa*, and  
141 11 in Arabidopsis (Brembu et al., 2006; Feiguelman et al., 2018; Li et al., 1998). Data describing how these  
142 molecular switches take effect are still limited and only some members of downstream signal transduction chains  
143 have been characterized in plants. In comparison to humans the obviously lower number of Rho-GTPases in  
144 plants raises the intriguing question how this restricted quantity is able to regulate the multitude of related  
145 processes. A potential plant specific answer to this particularly important question might be a multifaceted  
146 character of RIC-effectors interacting with various GTPases. In that regard, by integrating the observation that  
147 Nt-RIC11pt binds with differential affinity to diverse RAC/ROP-GTPases with data from several other studies  
148 the present article aims on demonstrating that the RIC-type of effectors represent a molecular network hub  
149 interconnecting various signalling pathways.

150

## 151 **2. MATERIALS AND METHODS**

### 152 **2.1 Yeast cultivation and two-hybrid screen**

153 Yeast strains were cultivated on YEP-based media with 2% glucose (YEPD) or synthetic complete (SCD) plates  
154 supplemented with amino acids in an incubator for 3-4 days at 30° (Stephan and Koch, 2009). All yeast two-  
155 hybrid screens and assays were performed using the BD Matchmaker system (BD Biosciences, Clontech  
156 Laboratories) utilizing the *Saccharomyces cerevisiae* strain AH109 essentially as described earlier (Stephan et  
157 al., 2014). Plasmid constructs based on vectors pGBKT7 (bait) and pGADGH (prey) were co-transformed into  
158 yeast and transformants were selected on SCD-medium lacking tryptophan, leucine, and histidine.

159

### 160 **2.2 Plant cultivation, pollen tube transformation and microscopic analysis**

161 *Nicotiana tabacum* (cv *Petite Havana SRI*) plants were cultivated on soil under standard conditions (Stephan et  
162 al., 2014). Pollen were germinated and pollen tubes cultured at 25°C in liquid PTNT medium (Read et al.,  
163 1993a; Read et al., 1993b). For transient pollen tube transformation the pollen was released from anthers and  
164 transferred on solid PTNT medium plates before biolistic particle bombardment with DNA-covered gold  
165 particles as described (Stephan et al., 2014). Transformed tobacco pollen tubes were grown for six hours at 25°C  
166 on PTNT plates. Thereafter a piece of solid medium together with growing pollen tubes was cut out and  
167 transferred upside-down onto cover slips. Confocal images were generated using a Leica TCS SP2 laser  
168 scanning microscope (PLAN FLUAR 1003/1.45 oil immersion objective; a HC PL APO 203/10.7 water  
169 immersion objective). YFP fluorescence was excited at 514 nm and detected between 530 and 600 nm.

170

### 171 **2.3 RNA analysis and real time qPCR**

172 Pollen, pollen tubes, and fresh tobacco tissue samples were frozen in liquid nitrogen. Tissue cells were disrupted  
173 and homogenized by a tissue lyser in a denaturing buffer containing guanidine-salts. Total RNA was isolated  
174 using the RNeasy Plant Mini Kit according to the manufacturer's protocol (QIAGEN, Germany) and eluted in  
175 30µl nuclease free water. Total RNA was treated with DNase before undergoing reverse transcription. For  
176 analysis of isolated RNA semi-quantitative reverse transcription-polymerase chain reaction (RT) PCR was  
177 performed with the iScript™ cDNA Synthesis Kit (BIORAD, Germany) according to the manufacturer's  
178 instructions using 500ng of isolated RNA. Primers specific to Nt-RIC11 and Nt-LF25 (Accession number:  
179 L18908) were used in multiplex semi-quantitative PCR, amplifying products of 260 and 380 bp. Quantitative  
180 cDNA detection was performed via quantitative real-time PCR (RT-qPCR) with the same gene-specific primers  
181 using the iQ™ SYBR® Green Supermix Kit (BIORAD). Serially diluted genomic DNA was used as a  
182 quantification standard.

183

### 184 **2.4 Plasmid construction and cloning of RAC/ROP-GTPases**

185 DNA manipulations, cloning and analysis were carried out according to standard techniques (Sambrook and  
186 Russell, 2001). Plasmid constructs for pull down were generated by amplifying coding sequences of target RAC  
187 genes with gene-specific primers from cDNA that was reverse-transcribed from isolated tobacco pollen tube  
188 RNA. The gene-specific forward and backward primers were designed in accordance with the 5' and 3' ends  
189 (from Start to Stop codon) of existing and predicted tobacco RAC DNA-sequences (see chapter 2.7 Accession  
190 numbers) which were retrieved from Genebank database (<https://www.ncbi.nlm.nih.gov/gene>). EcoRI and XhoI

191 restriction sites, which were added to the primer sequences, allowed to clone the complete amplified coding  
192 sequence of the respective tobacco RAC in pGADGH and pGEX-4T2 vectors. The obtained cDNA clones were  
193 verified by DNA-sequencing and BLAST searches.

194

## 195 **2.5 Pull down assays**

196 GST-fusion proteins were expressed in *E. coli* BL21 (DE3) cells that were transformed with constructs derived  
197 from pGEX-4T-2 vector containing different cDNA inserts. Purification of GST-fusion proteins from cell  
198 extracts and nucleotide loading of RAC/ROP-GTPases was performed as described earlier (Stephan et al., 2014).  
199 Pull down assays were performed utilizing myc-tagged proteins that were generated from recombinant pGBKT7-  
200 derivatives through *in vitro* transcription/translation using wheat germ extract (cat# L4330, Promega, Madison,  
201 WI, USA)(Stephan et al., 2014).

202

## 203 **2.6 Software tools**

204 Sequence analysis of proteins was performed with following software tools: Dompred  
205 (<http://bioinf.cs.ucl.ac.uk/psipred/?dompred=1>); PROSITE (<https://prosite.expasy.org>); GPS3.0 software  
206 (<http://gps.biocuckoo.org/>). Sequence percent identity matrix was created by Clustal2.1 software. Phylogenetic  
207 trees were generated using the ‘MEGA-X 10.0.5’– software (<https://www.megasoftware.net/>).

208

## 209 **2.7 Accession numbers**

210 DNA, RNA and Protein Sequence data are documented in the GenBank/EMBL database under following  
211 accession numbers:

212 **Nt-RAC1 = MN786790** [*similar to XP\_016464941 / XM\_016609455 / LOC107787847 (identical to protein*  
213 *AAK31299, but this has 19 nucleotide changes in mRNA sequence AY029330 / LOC107768360)*].

214 **Nt-RAC3 = MN786791** [*similar to XP\_016469644 / XM\_016614158 / LOC107791990*].

215 **Nt-RAC5 = XP\_016476800 / AJ222545 / LOC107798337; XP\_016512160 / XP\_016512162 / XP\_016512161 /**  
216 **AJ250174.1 / LOC107829207; AAD00117** (*All proteins are identical, but have different mRNA sequences*).

217 **Nt-RAC5.2 = MN786792** [*similar to Nt-RAC5, but mRNA has 18 nucleotide changes and protein has one P to S*  
218 *substitution*].

219

220

221

## 222 **3. RESULTS**

### 223 **3.1 Identification of tobacco RIC11 from pollen tubes using yeast two-hybrid**

224 To date only two RAC/ROP-GTPases have been described in *Nicotiana tabacum*, namely Nt-RAC1  
225 (Tao et al., 2002) and Nt-RAC5 (Kieffer et al., 2000), whereby the most comprehensively analysed is Nt-RAC5  
226 (AJ250174)(Kieffer et al., 2000; Klahre et al., 2006; Stephan et al., 2014). Additionally, the tobacco NTGP2  
227 (AAD00117) protein has to be mentioned which is identical to Nt-RAC5, however, their mRNA sequences  
228 differ.

229 Nt-RAC5 has been related to the control of polarized pollen tube growth (Kieffer et al., 2000) thereby regulating  
230 actin dynamics and membrane transport (Stephan et al., 2014).

231 To contribute novel information to the Nt-RAC5 effector network yeast two-hybrid (Y2H) screening  
232 methodology was used to identify proteins interacting with a constitutive active tobacco RAC5 mutant [G15V],  
233 because many downstream effector proteins, such as particularly CRIB-domain containing proteins, have been  
234 described to bind Rho in the GTP-bound “active” state (Feiguelman et al., 2018; Nagawa et al., 2010).  
235 In this screen of a pollen tube library several partial cDNAs of unknown proteins were identified as potential Nt-  
236 RAC5 downstream effectors, and in addition, a cDNA encoding an N-terminal truncated fragment (amino acids  
237 9-144) of a protein belonging to the family of CRIB-motif containing proteins (**Fig.1A**). Cloning of the  
238 corresponding full-length cDNA was performed by a PCR based strategy using gene specific primers, resulting  
239 in an open reading frame encoding a 144-amino acid (15-kD) protein (**Fig.1A,B**). BLAST search for Arabidopsis  
240 homologs revealed that this protein is most closely related to At-RIC11 (AT4G21745; 38% sequence identity)  
241 and At-RIC10 (AT4G04900.1; 36.3% identity) (**Fig.2A**).

242 To this day no protein sequences of *Nicotiana tabacum* RIC-family members were experimentally  
243 verified, however, computer predictions exist in NCBI database, whereby predicted<sub>pred</sub>Nt-RIC10 shows high  
244 sequence similarity (64%) while predicted<sub>pred</sub>Nt-RIC11 has the best match (84.2%) (**Fig.1B**), therefore the isolated ORF  
245 from pollen tubes is called Nt-RIC11pt hereafter.

246 Further homologs were identified in several other plant species, with nearest in Solanaceae, Asteraceae,  
247 and Salicaceae, while outside of plant kingdom only two were identified, namely the closest non plant homolog  
248 *Homo sapiens* WASP (Kim et al., 2000)(22.4% identity), and *Saccharomyces cerevisiae* STE20 (15.4%).  
249 Interestingly, Sc-STE20 is involved in polarized pseudohyphal growth of yeast and the pheromone response  
250 pathway, whereby Sc-STE20 is a direct interaction partner of the yeast CDC42 Rho-like GTPase (Bardwell,  
251 2005; Gancedo, 2001) which is the homolog of tobacco Nt-RAC5. Additionally, the human Wiskott–Aldrich  
252 syndrome protein (WASP), which contains a CRIB-domain, has been identified as a direct effector of Hs-  
253 CDC42 regulating actin-dynamics (Abdul-Manan et al., 1999; Kim et al., 2000). Thus, Nt-RIC11pt, Sc-STE20,  
254 and Hs-WASP correspondingly interact with CDC42 related small GTPases, what allows to hypothesize an  
255 effector function for tobacco Nt-RIC11pt in polarized growth and actin-dynamics, as well as a potential role in  
256 intracellular transduction of extracellular signals.

257

### 258 **3.2 Protein structure of Nt-RIC11pt**

259 Interestingly, the experimentally verified Nt-RIC11pt does not fully match the predictions and thus  
260 appears to be a hybrid-like protein combining the computed sequence characteristics of both, predicted<sub>pred</sub>Nt-RIC10 and  
261 predicted<sub>pred</sub>Nt-RIC11 (**Fig.1B**). Sequence alignments with all predicted tobacco RICs demonstrate that the isolated Nt-  
262 RIC11pt shares some amino acids exclusively either with predicted<sub>pred</sub>Nt-RIC10 (**Fig.1B**; blue boxes), or predicted<sub>pred</sub>Nt-RIC11  
263 (**Fig.1B**; green box), whereas the CRIB-domain and an adjoining region are highly conserved (**Fig.1B**; red box;  
264 yellow box).

265 A striking feature is the exceptional number of clustered serine residues in Nt-RIC11pt (**Fig.1B**;  
266 asterisks), which primarily accumulate C-terminally of the CRIB-domain in areas either similar to predicted<sub>pred</sub>Nt-RIC10  
267 (**Fig.1A**; blue boxes) or predicted<sub>pred</sub>Nt-RIC11 (**Fig.1A**; green box). Through sequence analysis with GPS3.0, NetPhos  
268 3.1, and KinasePhos software several putative phosphorylation sites were identified (**Fig.1A**; bold S and T).

269 Based on alignments including all known Arabidopsis and predicted *Nicotiana tabacum* RIC proteins a  
270 phylogenetic tree was generated using maximum likelihood estimation with 500 replications (**Fig.2C**). The  
271 unrooted tree and amino acid similarities resulted in categorization of all RICs in five groups, whereby Nt-

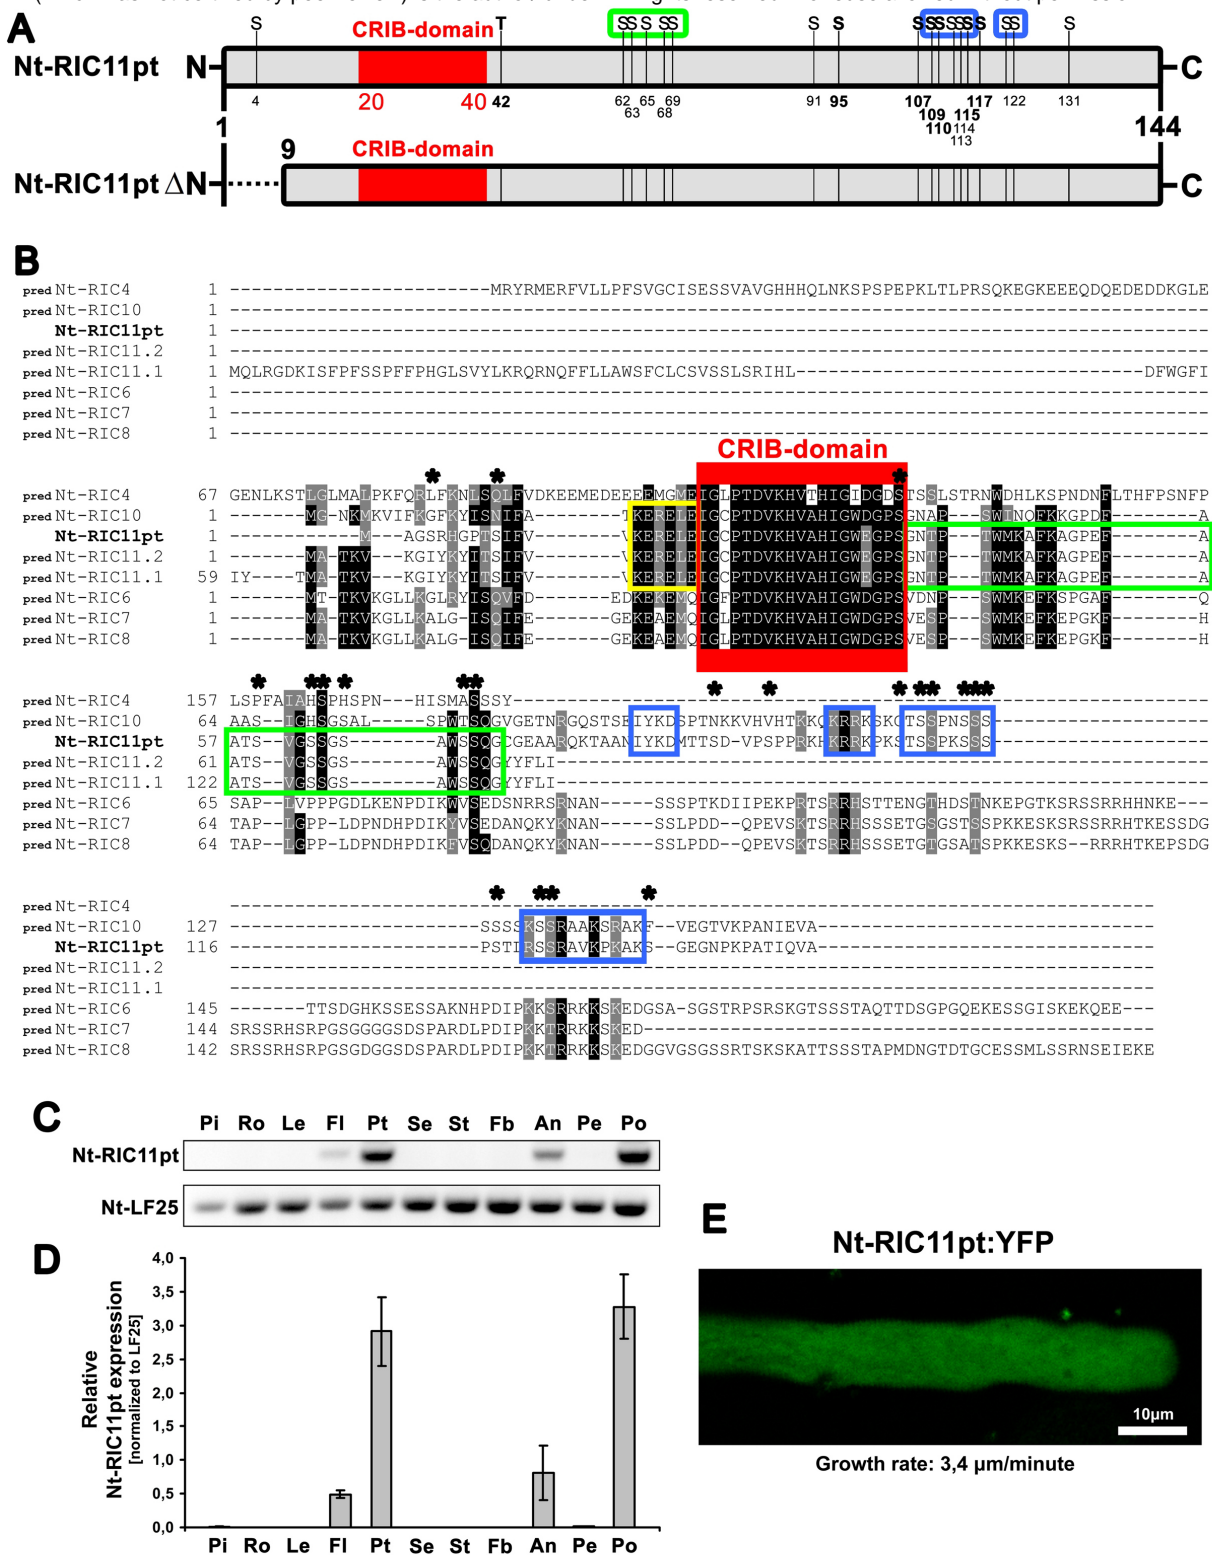

**Figure 1. Domain Structure, Amino Acid Sequence Comparison, Tissue Specific Expression Levels, and Subcellular Localization of Tobacco Nt-RIC11pt.**

(A) Domain structure of full-length Nt-RIC11pt protein (aa 1-144; top) and the N-terminal truncated version (aa 9-144) identified in the yeast two-hybrid screen as Nt-RAC5 interaction partner. S highlight the position of serine residues in Nt-RIC11pt predicted as potential phosphorylation sites via GPS3.0 software; Bold S and T highlight the serine and threonine residues consistently predicted by GPS3.0, NetPhos 3.1 (<http://www.cbs.dtu.dk/services/NetPhos/>), and KinasePhos (<http://kinasephos.mbc.nctu.edu.tw/>) software. Red box: CRIB-motif; Blue boxes: Serine residues homologous between Nt-RIC11pt and predicted predNt-RIC10 (XP\_016467450); Green box: Serine residues conserved between Nt-RIC11pt and predicted Nt-RIC11 isoforms predNt-RIC11.1 (XP\_016507046) and predNt-RIC11.2 (XP\_016507047).

(B) Clustal Omega Amino Acid Sequence Alignment (<https://www.ebi.ac.uk/Tools/msa/clustalo/>) of Nt-RIC11pt with 7 predicted *Nicotiana tabacum* RICs identified by BLAST search. The tobacco predNt-RIC sequences were predicted by automated computational analysis of genomic sequences (HMM-based gene prediction program Gnomon ([https://www.ncbi.nlm.nih.gov/genome/annotation\\_euk/gnomon/](https://www.ncbi.nlm.nih.gov/genome/annotation_euk/gnomon/))).

Black shading: sequence identity; Gray shading: sequence similarity; Red box: CRIB-motif; Blue boxes: Amino acid sequences specifically conserved between isolated Nt-RIC11pt and predNt-RIC10 (XP\_016467450); Green boxes: Amino acid sequences specifically conserved between isolated Nt-RIC11 and predicted predNt-RIC11 isoforms predNt-RIC11.1 (XP\_016507046) and predNt-RIC11.2 (XP\_016507047); Yellow box: Amino acids conserved between Nt-RIC11pt, predicted predNt-RIC10 and both predicted predNt-RIC11 isoforms; Black asterisks mark all serine residues in Nt-RIC11pt; Nt: *Nicotiana tabacum*.

(C) Semi-quantitative RT-PCR analysis of Nt-RIC11pt mRNA levels in different wild-type tobacco tissues compared to mRNA levels of the Nt-LF25 reference gene. The mRNA was purified from different plant tissues and used as template for cDNA synthesis. Corresponding cDNA was analysed with gene specific primers via multiplex PCR and the amplified products were stained with ethidium bromide and analysed on a 2% agarose gel.

Pi: pistils; Ro: roots; Le: leaves; Fl: flowers; Pt: pollen tubes; Se: sepals; St: stems; Fb: flower buds; An: anthers; Pe: petals; Po: pollen.  
 (D) Nt-RIC11pt mRNA levels in different wild-type tobacco tissues analysed by quantitative reverse transcription real time polymerase chain reaction (qRT-PCR) assay using gene specific primers for Nt-RIC11pt and the Nt-LF25 reference gene (Materials and Methods). Displayed is the mean relative Nt-RIC11pt mRNA level of three biological replicates normalized to Nt-LF25 mRNA.

Pi: pistils; Ro: roots; Le: Leaves; Fl: flowers; Pt: pollen tubes; Se: sepals; St: stems; Fb: flower buds; An: anthers; Pe: petals; Po: pollen.

(E) Single confocal optical section through a normal growing pollen tube transiently expressing Nt-RIC11pt:YFP 6h after gene transfer. The Nt-RIC11pt fusion protein shows a clear cytoplasmic distribution pattern. Bar = 10  $\mu$ m.



## Figure 2

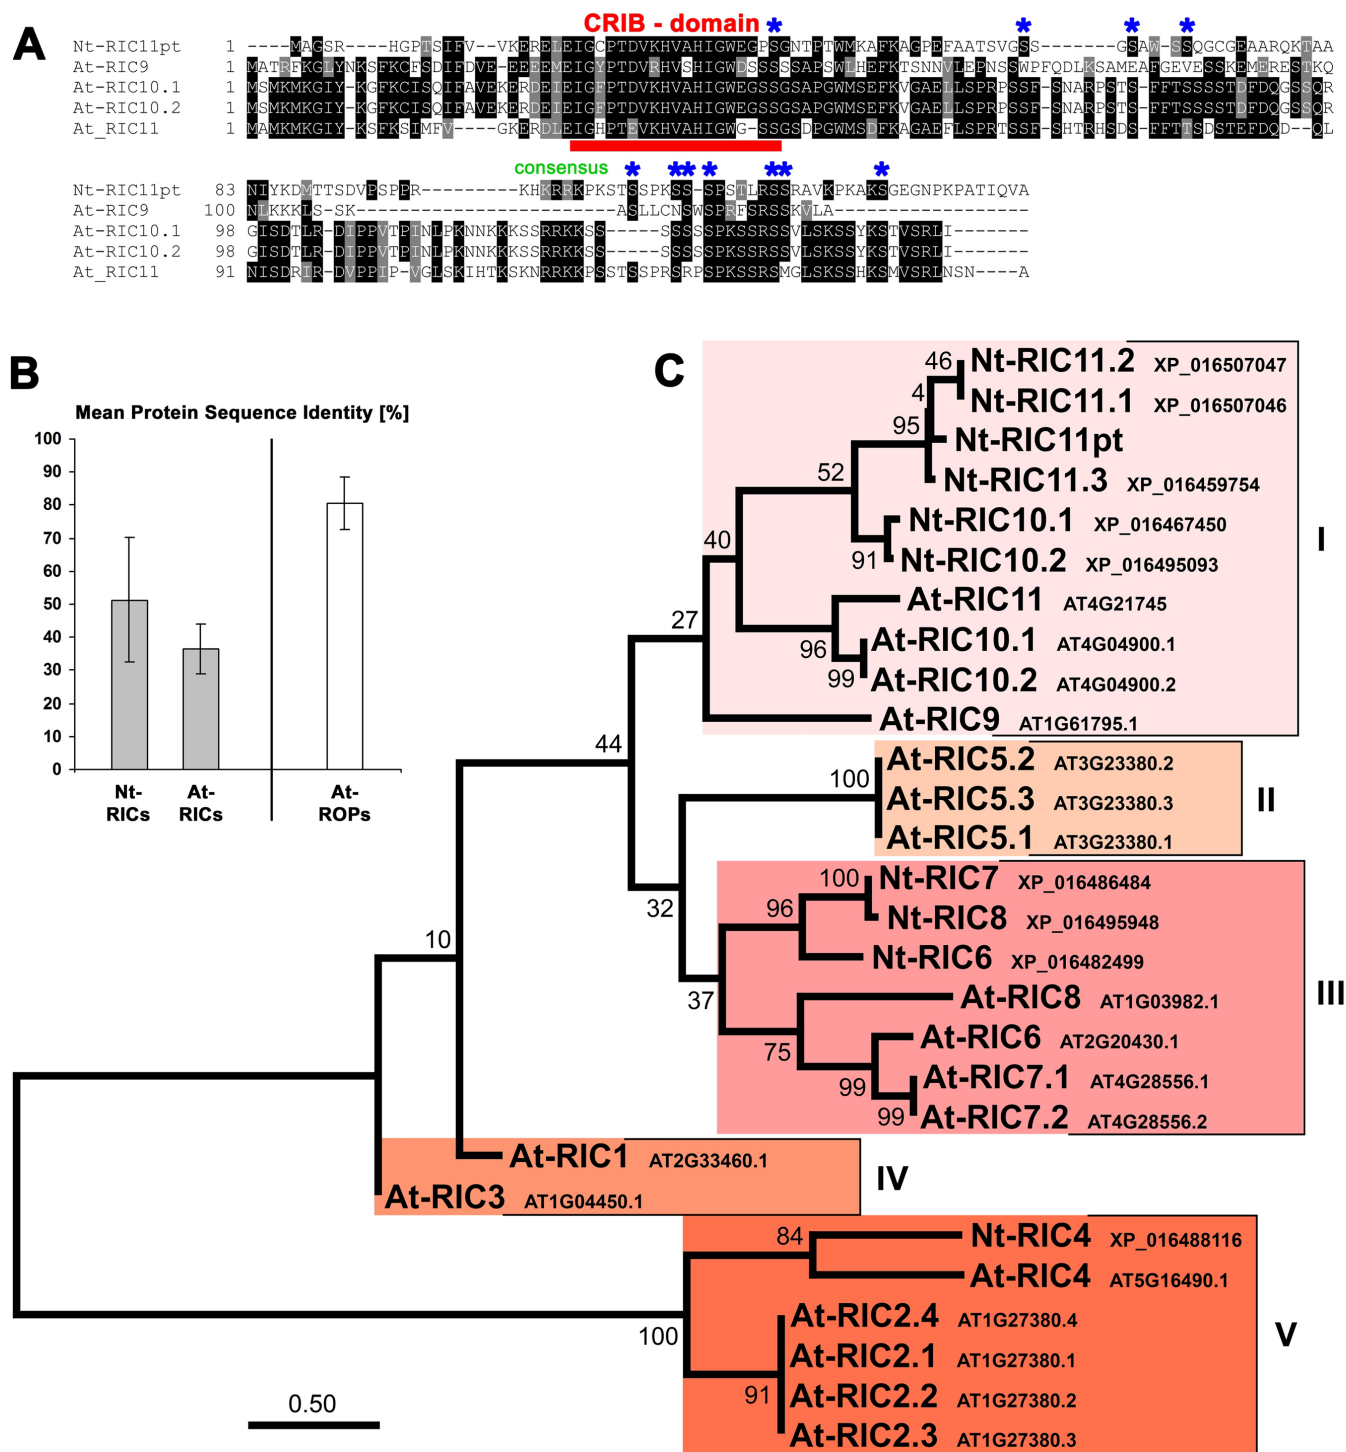

**Figure 2. Comparison of Nt-RIC11pt with Closest Homologs from *Arabidopsis thaliana* and predicted *Nicotiana tabacum* RICs .**

(A) Clustal Omega Amino Acid Sequence Alignment of Nt-RIC11pt with *Arabidopsis thaliana* At-RIC9 (AT1G61795.1), At-RIC10.1 (AT4G04900.1), At-RIC10.2 (AT4G04900.2), and At-RIC11 (AT4G21745) from TAIR database. Black shading: sequence identity; Gray shading: sequence similarity; Blue asterisks mark all serine residues conserved between Nt-RIC11pt, At-RIC9, At-RIC10, and At-RIC11; Red bar: highly conserved CRIB domain; Nt: *Nicotiana tabacum*; At: *Arabidopsis thaliana*.

(B) Statistical analysis of protein sequence identities of 18 known *Arabidopsis* RICs, 9 computer predicted tobacco RICs, and for comparison of 11 known *Arabidopsis* ROPs. Indicated are their respective mean sequence identities [%] and the standard deviation.

(C) Phylogenetic analysis delineated in an unrooted tree obtained by maximum likelihood estimation and JTT matrix-based model providing protein amino acid sequence relationships between Nt-RIC11pt, known At-RICs from *Arabidopsis thaliana*, and computer predicted Nt-RICs of *Nicotiana tabacum* from database search. All RICs were classified in V groups (various red tones) according to sequence similarity. Phylogeny reconstruction was generated using ‘MEGA-X 10.0.5 - software’. The indicated bootstrap values are based on 500 replications and the scale bar for branch lengths indicates the number of amino acid substitutions per site. Locus/Accession number is given for every protein.

At: *Arabidopsis thaliana*; Nt: *Nicotiana tabacum*.

272 RIC11pt belongs to group I, comprising RIC9, RIC10, and RIC11 (**Fig.2C**). Sequence alignment of tobacco Nt-  
273 RIC11pt with Arabidopsis group I members indicates that amino acid similarity is limited to the CRIB-domain, a  
274 conserved consensus sequence and several serine residues (**Fig.2A**). Interestingly, sequence similarity of the  
275 complete RIC-family is significantly low among its members (**Fig.2B**) and primarily restricted to the highly  
276 conserved CRIB-domain, a conserved consensus sequence (KX[RK]N[KR]KXX) and an adjacent conserved  
277 serine/threonine site (**Fig.3A,B**). The localization of these conserved structural features within the amino acid  
278 sequence of RICs evidently specifies members of the respective phylogenetic group (**Fig.3B**).

279

### 280 **3.3 Tissue-dependent expression profile and subcellular localization of Nt-RIC11pt**

281 To identify the tissue-dependent expression pattern of Nt-RIC11pt its transcript levels were investigated  
282 from total RNA samples obtained from various tobacco plant organs. Semi-quantitative RT-PCR analysis  
283 indicates that Nt-RIC11pt mRNA accumulates predominantly to high levels in tobacco pollen and pollen tubes  
284 (**Fig.1C**). Additionally Nt-RIC11pt transcripts were also found at low levels in anthers and even smaller  
285 quantities in mature flowers, what is most probably due to the fact that pollen are components of these tissue  
286 samples.

287 These results were confirmed by quantitative real-time PCR analysis of derived cDNA from three biological  
288 replicates (**Fig.1D**). The quantitative data of Nt-RIC11pt transcript levels were normalized to mRNA levels of  
289 reference genes, such as the constitutively expressed tobacco LF25 ribosomal protein (**Fig.1D**).

290 Interestingly, this distinct expression pattern, showing highest Nt-RIC11pt levels in pollen and pollen  
291 tubes, correlates with the one described for tobacco Nt-RAC5 (Klahre et al., 2006) and Arabidopsis At-ROP1,  
292 additionally, At-ROP3, At-ROP5, At-ROP11 show expression profile overlaps in pollen and flowers, but are  
293 also allocated to other vegetative tissues (Dorjgotov et al., 2009; Li et al., 1998).

294 To gain insight into the subcellular localization of Nt-RIC11pt in pollen tubes, YFP (yellow fluorescent  
295 protein) was fused to the C-terminus of Nt-RIC11pt (Nt-RIC11pt:YFP) and plasmids encoding the constructs  
296 were transiently transformed in tobacco pollen by biolistic particle bombardment. Six hours after gene transfer  
297 normal growing pollen tubes transiently expressing Nt-RIC11pt:YFP under control of the LAT52 promoter were  
298 analysed by confocal microscopy to determine the intracellular distribution. Nt-RIC11pt:YFP was detected  
299 evenly distributed in the pollen tube cytoplasm (**Fig.1E**), what resembles the reported localization pattern of  
300 related Arabidopsis RIC10 (Wu et al., 2001) from the same phylogenetic group (**Fig.2C**).

301 Altogether, these data, which were derived from *in vitro* cultured pollen tubes, indicate that Nt-RIC11pt  
302 is predominantly expressed at high levels in mature pollen and in growing pollen tubes, particularly localized in  
303 the cytoplasm, what suggests that Nt-RIC11pt may play a role during pollen germination and tube growth.

304

### 305 **3.4 Interaction of Nt-RIC11pt with Nt-RAC5 in yeast two-hybrid and pull down assay**

306 The highly conserved CRIB-domain of CDC42/RAC-effectors binds to GTPases in a GTP-dependent  
307 manner. To investigate if Nt-RIC11pt interacts specifically with the GTP-bound active form of RAC5-GTPase  
308 yeast-two hybrid assays were performed with constitutively active RAC5[G15V], dominant negative  
309 RAC5[T20N], and wild-type RAC5 fused to the DNA-binding domain of GAL4 transcription factor (GAL4-  
310 DBD). Growth of yeast transformants demonstrates that full-length tobacco Nt-RIC11pt fused to the activation  
311 domain of GAL4 (GAL4-AD:Nt-RIC11pt) interacted with ca RAC5[G15V], and to a lesser extent with wild-  
312 type RAC5, however, no two-hybrid interaction was detected with dn RAC5[T20N] (**Fig.4A**), which is an

## Figure 3

**A**

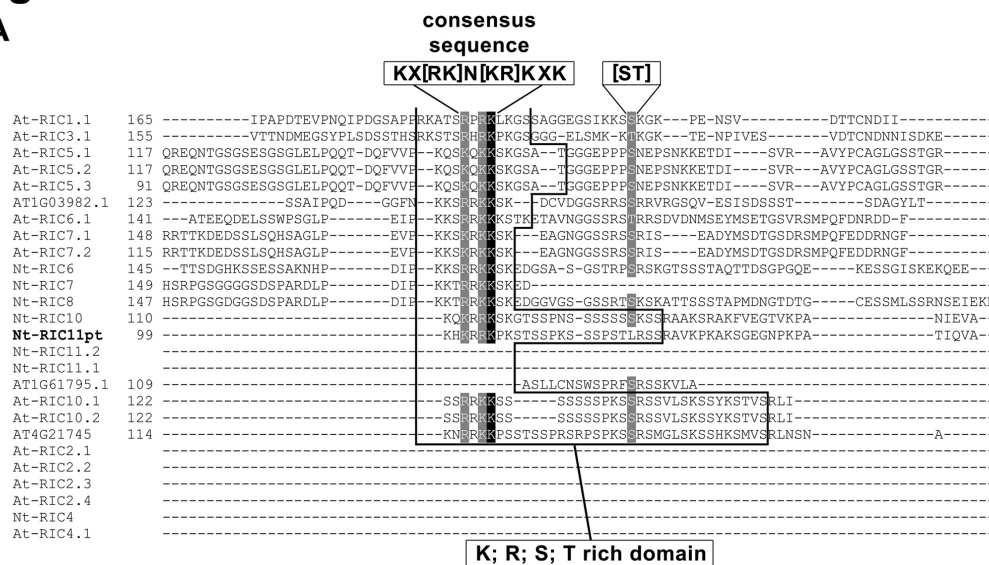

**B**

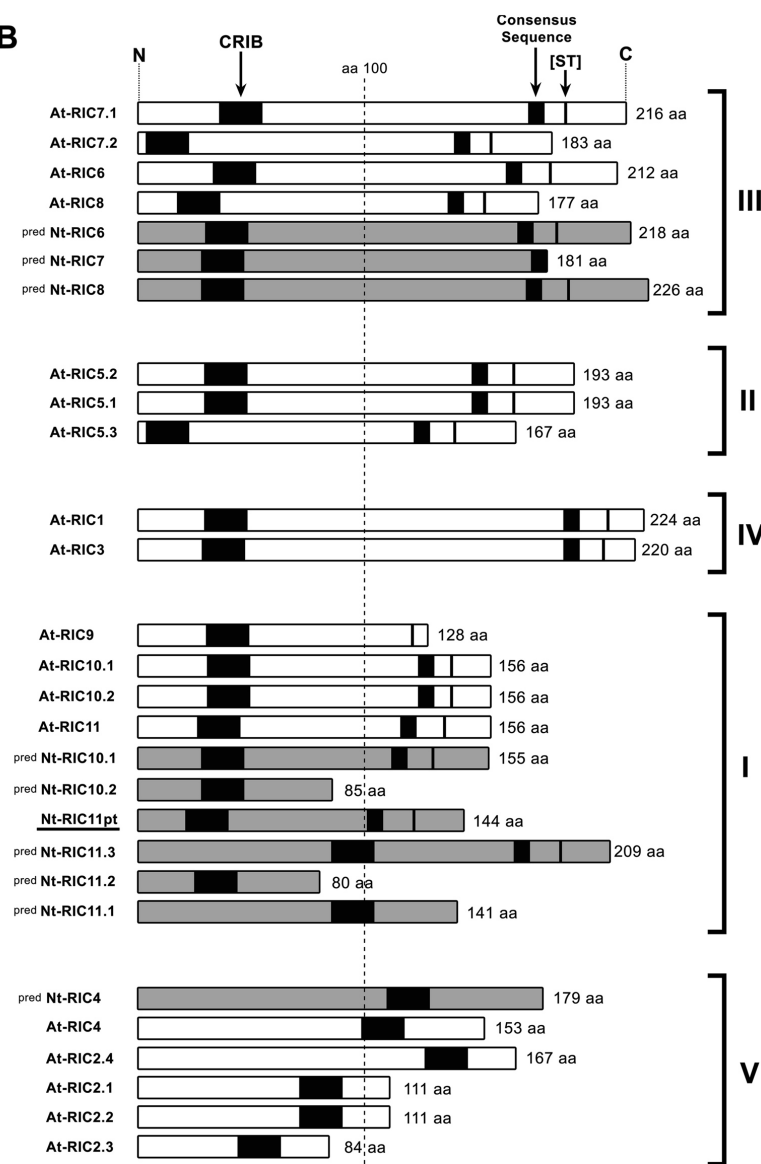

**Figure 3. Domain Structure Comparison of all known Arabidopsis and predicted Tobacco RICs**

(A) Clustal Omega Amino Acid Sequence Alignment of Nt-RIC11pt with all known *Arabidopsis* homologs and 7 predicted *Nicotiana tabacum* RICs identified by database search. The tobacco predNt-RIC Sequences were predicted by automated computational analysis of genomic sequences (HMM-based gene prediction program Gnomon ([https://www.ncbi.nlm.nih.gov/genome/annotation\\_euk/gnomon/](https://www.ncbi.nlm.nih.gov/genome/annotation_euk/gnomon/))). Indicated are the highly conserved consensus sequence and the conserved serine/threonine [ST] residue. Black shading: sequence identity; Gray shading: sequence similarity; At: *Arabidopsis thaliana*; Nt: *Nicotiana tabacum*.

(B) Protein domain structure comparison of Nt-RIC11pt with all known Arabidopsis At-RICs (white) and 7 predicted *Nicotiana tabacum* RICs (grey) identified by database search. RICs were classified in V groups according to sequence similarity. Black boxes: indicate the CRIB-domain, as well as the consensus sequence and the conserved serine/threonine residue in the K/R/S/T rich domain; pred.: predicted; aa: amino acid; At: *Arabidopsis thaliana*; Nt: *Nicotiana tabacum*.

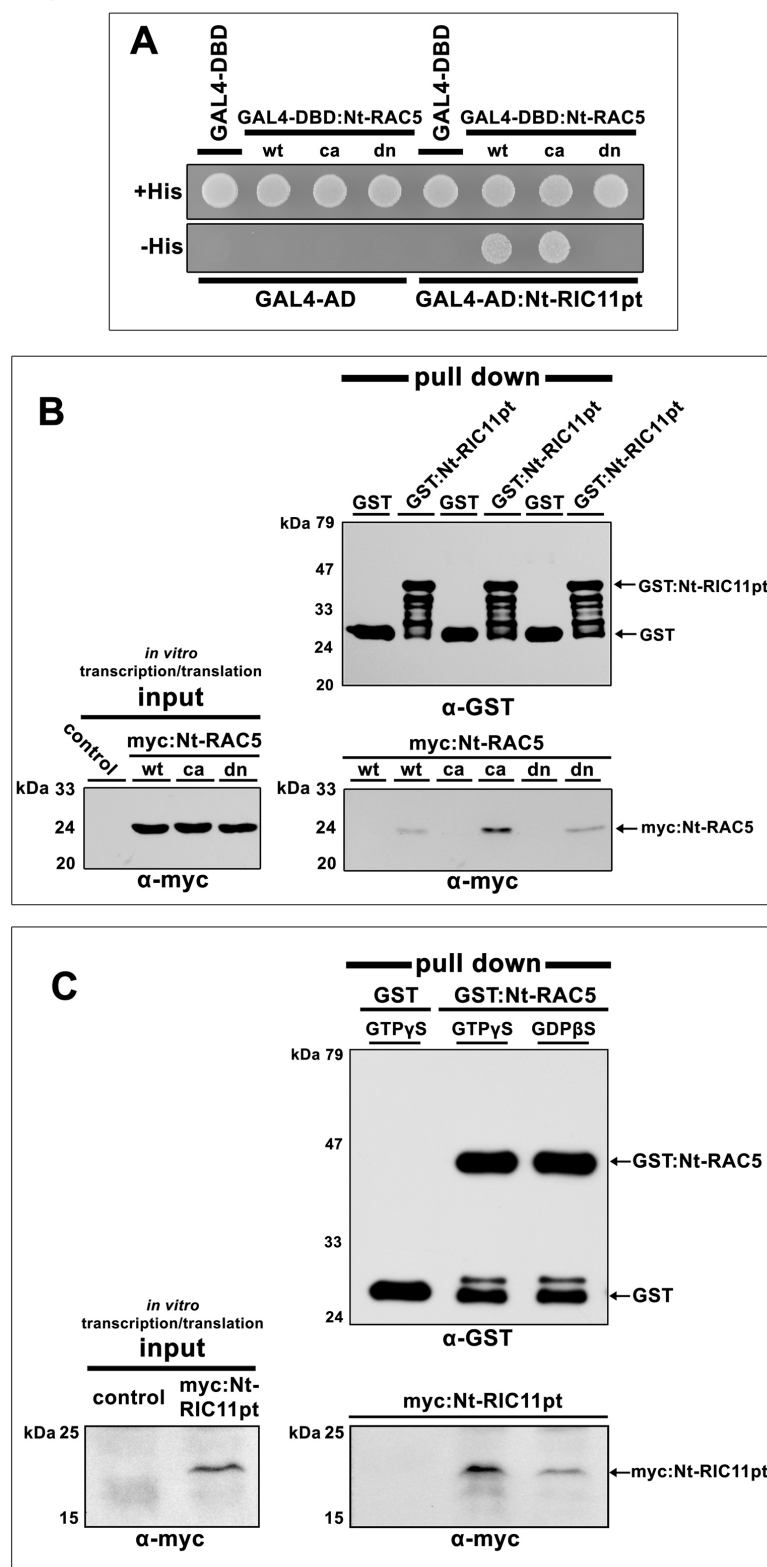

**Figure 4. Interaction of Nt-RIC11pt with Constitutively Active, Dominant Negative as well as GDP- or GTP-Loaded Wild-type forms of RAC5 in Pull Down Assays and Yeast Two-Hybrid Assay.**

(A) Yeast transformants co-expressing either wild-type (wt), or constitutive active (ca: G15V), or dominant-negative (dn: T20N) Nt-RAC5 fused to the DNA binding domain of the GAL4 transcription factor (GAL4-DBD) together with Nt-RIC11pt fused to the GAL4 activation domain (GAL4-AD). Cells from single yeast transformant colonies were diluted in water and equal amounts plated on histidine-free culture medium (-His) to analyse for two-hybrid interaction. As positive growth control all transformants were also plated on histidine containing medium (+His). Controls for specific protein interaction were transformants co-expressing the Nt-RIC11pt prey protein with just the GAL4-DBD, as well as transformants co-expressing Nt-RAC5 bait protein together with just the GAL4-AD.

(B) Equal amounts of GST-tagged Nt-RIC11pt protein were immobilized on glutathione-coupled bead matrix, washed and purified from *E. coli* cell extracts. Matrix-bound GST:Nt-RIC11pt fusion protein was incubated with *in vitro* transcribed/translated myc:Nt-RAC5 (either wild type [wt], or constitutive active [ca], or dominant-negative [dn] versions of Nt-RAC5). Beads loaded with GST served as control. Precipitated GST:Nt-RIC11pt and co-purified myc-tagged Nt-RAC5 proteins were separated via SDS-PAGE and analysed by immunoblotting applying anti-GST antibodies (upper panel) and anti-myc antibodies (lower panel). Input panel on the left shows *in vitro* transcription/translation of myc:Nt-RAC5 fusion proteins, which were subsequently subjected to pull down assay. GST: Glutathione-S-Transferase affinity tag; Nt: *Nicotiana tabacum*.

(C) GST-tagged wild type Nt-RAC5 was purified from *E. coli* cell extracts via magnetic beads. The matrix-bound GST:Nt-RAC5 fusion proteins were either loaded with GDP $\beta$ S or GTP $\gamma$ S and then incubated with *in vitro*-transcribed/translated myc:Nt-RIC11pt. Beads loaded with GST served as control. Precipitated GST-tagged Nt-RAC5 and co-purified myc-tagged Nt-RIC11pt proteins were separated via SDS-PAGE and analysed by immunoblotting applying anti-GST antibodies (upper panel) and anti-myc antibodies (lower panel).

313 inactive mutant form of RAC5 representing the conformation of its nucleotide-free transition state (Feig, 1999;  
314 Stephan et al., 2014).

315 In pull down assays, heterologously expressed N-terminally GST-tagged Nt-RIC11pt was purified from  
316 *E. coli* via glutathione-coupled bead matrix. The immobilized GST:Nt-RIC11pt fusion interacted specifically  
317 with myc-tagged wild-type RAC5 (myc:Nt-RAC5), ca RAC5[G15V], and dn RAC5[T20N], which were  
318 produced by *in vitro* transcription/translation (**Fig.4B**). Immobilized GST alone served as control for specificity  
319 of binding. Immunological detection of epitope-tagged fusion proteins with anti-myc and anti-GST antibodies in  
320 the pull down precipitates demonstrates a significant interaction specifically between GST:Nt-RIC11pt and myc-  
321 tagged ca RAC5[G15V] (**Fig.4B**), whereas on the other hand, the reduced binding to wild-type RAC5 and  
322 equally to dn RAC5[T20N] suggests an additional GTP-independent constitutive interaction between Nt-  
323 RIC11pt and Nt-RAC5 on a weaker basal level (**Fig.4B**). Most importantly, **figure 4C** shows that this weak  
324 constitutive binding of Nt-RIC11pt to wild-type Nt-RAC5 in its inactive GDP-loaded conformation becomes  
325 significantly more pronounced when wild-type Nt-RAC5 is in the GTP-loaded active state (**Fig.4C**).

326 In summary, data of **figure 4** demonstrate that Nt-RIC11pt is an interactor of GTP-loaded active Nt-  
327 RAC5, however, also a constitutive GTP-independent binding on a basal comparably lower level was  
328 additionally shown. In this regard, Y2H detects an interaction of Nt-RIC11pt with constitutively active and wild-  
329 type RAC5, but not with dominant negative mutant RAC5, whereas Pull down assays, on the other hand, present  
330 a more detailed picture by clearly indicating a basal interaction between Nt-RIC11pt and wild-type Nt-RAC5,  
331 which becomes significantly more distinct in a GTP-dependent manner.

332

### 333 3.5 Nt-RIC11pt interacts with different types of RAC/ROP-GTPases

334 Arabidopsis ROP1 has been reported to interact with different types of At-RICs, such as At-RIC1, At-  
335 RIC2, At-RIC4, At-RIC5, At-RIC7, and At-RIC9 (Wu et al., 2001), however, they did not analyse a potential  
336 interaction between At-ROP1 and At-RIC11. Considering the existing data of Wu et al. (Wu et al., 2001) their  
337 observations would mean by implication that Nt-RIC11pt may potentially bind to various tobacco RAC/ROP  
338 GTPases. To check if tobacco Nt-RIC11pt is limited to interaction exclusively with Nt-RAC5, and to examine if  
339 Nt-RIC11pt is involved in additional pathways regulated by other RAC/ROP-GTPases, the physical interaction  
340 with Nt-RAC1, Nt-RAC3, Nt-RAC5, and Nt-RAC5.2 has been analysed by comparison. Therefore, pull down  
341 assays were performed, in which these tobacco RACs were heterologously expressed as N-terminal GST-tagged  
342 fusion proteins in *E. coli*, allowing their immobilization and purification via affinity-matrix. The RAC-DNA  
343 sequences were isolated with gene-specific primers via PCR amplification of cDNA, which was reverse  
344 transcribed from tobacco pollen tube RNA (Materials and Methods). The translated protein sequence of isolated  
345 Nt-RAC3 cDNA (MN786791) is identical with that of computer predicted tobacco Rac-like GTP-binding  
346 protein 3 (LOC107791990) and shows highest sequence homology with Arabidopsis At-ROP11 (86.6% identity)  
347 and At-ROP10 (86.3% identity) (**Fig.5D**). The experimentally obtained Nt-RAC1 (MN786790) is identical with  
348 tobacco RAC1 protein (**Fig.5D**) (see chapter 2.7 Accession numbers; AAK31299) (Chen et al., 2003; Tao et al.,  
349 2002) and has highest sequence homology with At-ROP1 (96.95% identity) and the related group members At-  
350 ROP3 (96.4% identity) and At-ROP5 (95.4% identity) (**Fig.5D**). The isolated Nt-RAC5.2 represents an isoform  
351 of Nt-RAC5 (LOC107829207; LOC107798337; AAD00117) (Kieffer et al., 2000; Stephan et al., 2014).

352 Pull Down experiments demonstrate that *in vitro* transcribed/translated myc:Nt-RIC11pt significantly  
353 interacted specific with GTP $\gamma$ S-loaded GST-tagged Nt-RAC1, Nt-RAC3, Nt-RAC5, and Nt-RAC5.2 (**Fig.5A**).

## Figure 5

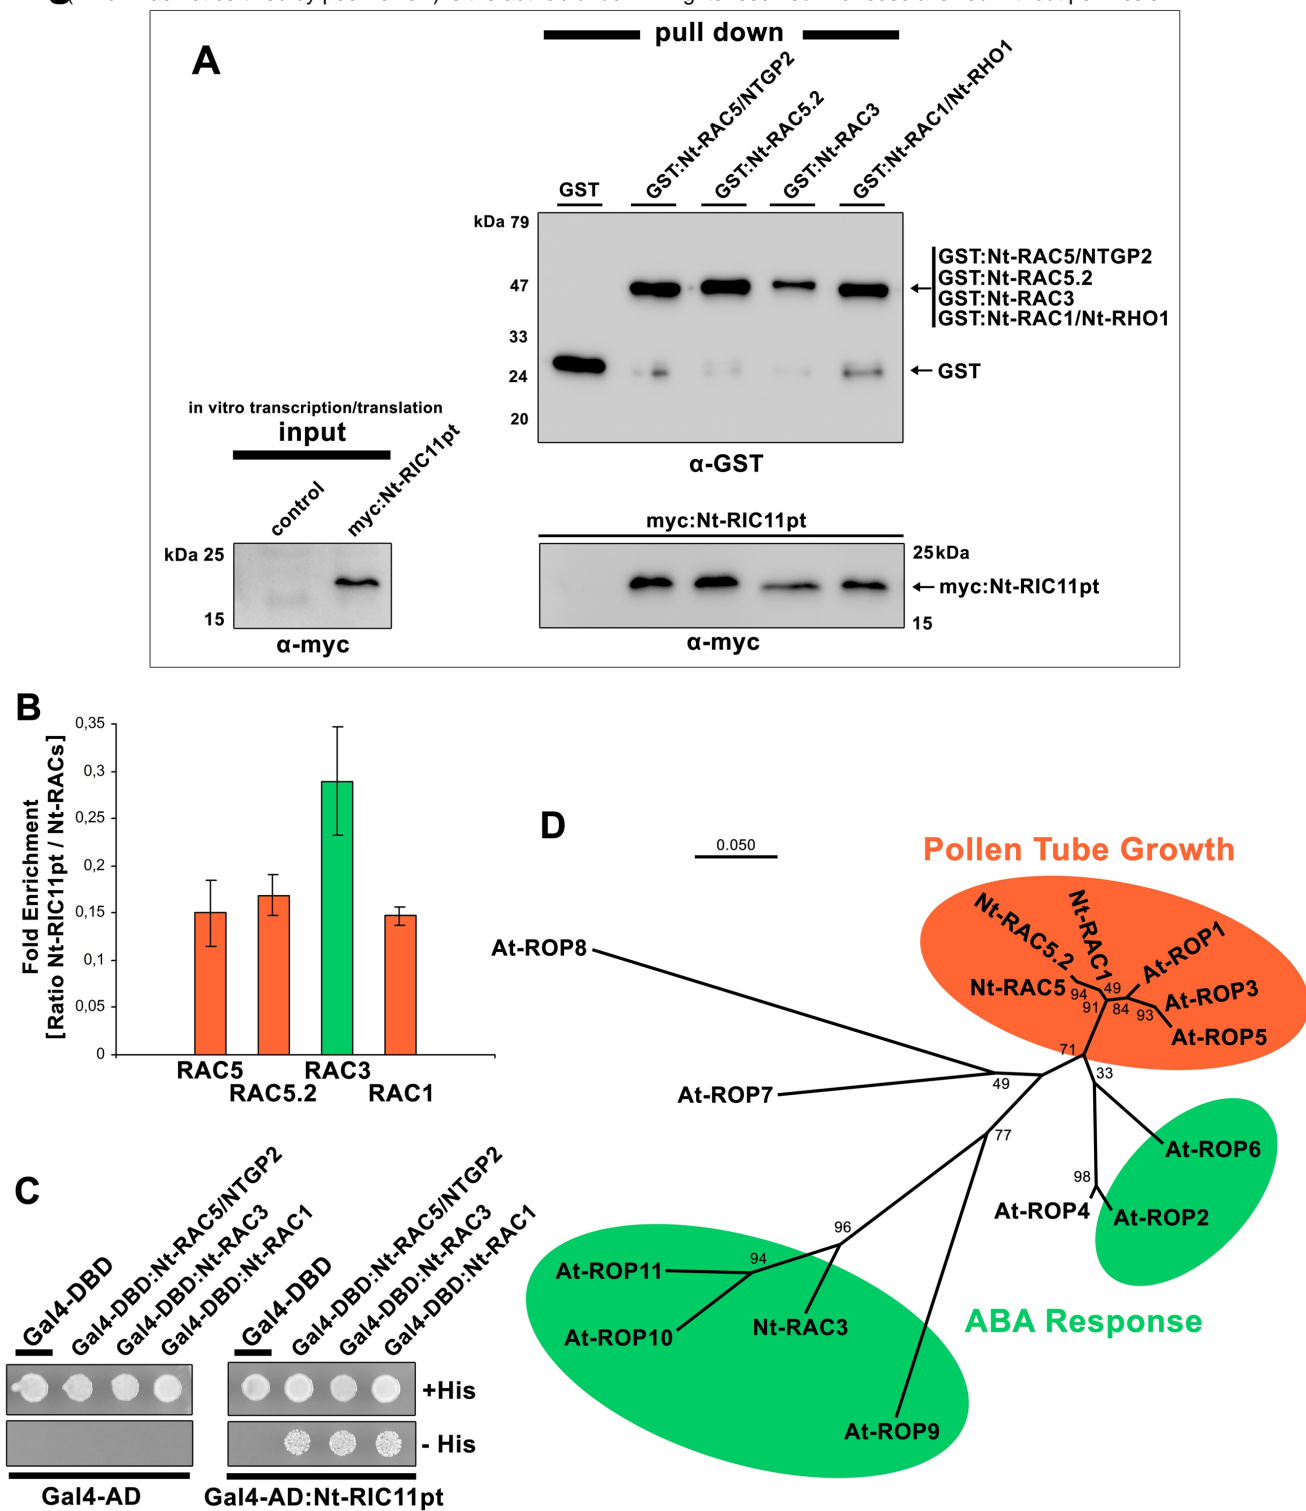

**Figure 5. Interaction of Nt-RIC11pt with Nt-RAC3, Nt-RAC5, Nt-RAC5.2, and Nt-RAC1, in Pull Down and Yeast Two-Hybrid Assays.**

(A) GST-tagged Nt-RAC proteins (RAC1, RAC3, RAC5, RAC5.2) were immobilized on magnetic bead matrix, washed and purified from *E. coli* cell extracts. Each matrix-bound GST:Nt-RAC fusion protein was equally loaded with GTP $\gamma$ S and incubated with *in vitro* transcribed/translated myc:Nt-RIC11pt. Beads loaded with GST served as control. Precipitated GST-tagged Nt-RACs and co-purified myc-tagged Nt-RIC11pt proteins were separated via SDS-PAGE and analysed by immunoblotting applying anti-GST antibodies (upper panel) and anti-myc antibodies (lower panel). Input panel on the left shows *in vitro* transcription/translation of myc:Nt-RIC11pt fusion proteins, which were subsequently subjected to pull down assay.

GST: Glutathione-S-Transferase affinity tag.

(B) Statistical analysis of protein quantities purified in pull down experiment from (A). Displayed are mean values of the ratio representing myc:Nt-RIC11pt enrichment relative to precipitated GST:Nt-RAC. Co-precipitated myc:Nt-RIC11pt quantities were individually normalized to the myc:Nt-RIC11pt co-precipitate of the GST-background control beforehand. The signal intensities of chemoluminescence detection were determined by digital imaging and quantified by ImageJ software (<https://imagej.nih.gov/ij/>). The mean values are calculated from four independent pull down experiments and their standard error is indicated. Red columns: RAC/ROPs assigned to pollen tube growth; Green columns: RAC/ROPs assigned to ABA response pathway.

(C) Yeast transformants co-expressing either Nt-RAC5, Nt-RAC3, or Nt-RAC1 fused to the DNA binding domain of the GAL4 transcription factor (GAL4-DBD) together with Nt-RIC11pt fused to the GAL4 activation domain (GAL4-AD). Cells from yeast transformant single colonies were diluted in water and equal amounts plated on histidine-free culture medium (-His) to analyse for two-hybrid interaction. Equal amounts of all transformants were also plated on histidine containing medium (+His) as positive growth control. Controls for specific protein interaction were transformants co-expressing the Nt-RIC11pt prey protein with just the GAL4-DBD, as well as transformants co-expressing Nt-RAC5, Nt-RAC3, or Nt-RAC1 bait proteins together with just the GAL4-AD.

(D) Phylogenetic analysis presented as unrooted radial tree obtained by maximum likelihood estimation and JTT matrix-based model providing protein amino acid sequence relationships between known ROPs of *Arabidopsis thaliana*, and RAC1, RAC3, RAC5, as well as RAC5.2 of *Nicotiana tabacum*, which were analysed in pull down experiment from (A) and yeast two hybrid assay from (C). The phylogeny reconstruction was generated using 'MEGA-X 10.0.5 - software'. The indicated bootstrap values are based on 500 replications and the scale bar for branch lengths indicates the number of amino acid substitutions per site. At: *Arabidopsis thaliana*; Nt: *Nicotiana tabacum*; Red: RAC/ROPs assigned to pollen tube growth; Green: RAC/ROPs assigned to ABA response pathway.

354 Pull down assays were performed in quadruplicate to control for variations in the efficiency of precipitation. As  
355 an additional control binding of myc:Nt-RIC11pt to GST alone was analysed in parallel. No significant  
356 interaction was detected between GST and myc:Nt-RIC11pt (**Fig. 5A**). Interestingly, digital quantification of the  
357 western blot signals demonstrates that equal quantities of myc:Nt-RIC11pt were co-precipitated proportionally  
358 with GST:Nt-RAC1, GST:Nt-RAC5, and GST:Nt-RAC5.2, indicating that the interactions of Nt-RIC11pt with  
359 these three GTPases are equally strong (**Fig.5B**). On the other hand, almost twice as much Nt-RIC11pt has been  
360 co-precipitated proportionally with Nt-RAC3, what suggests that Nt-RIC11pt has a much higher affinity to Nt-  
361 RAC3 compared to Nt-RAC1, Nt-RAC5, and Nt-RAC5.2 (**Fig.5B**).

362 In Y2H-assays Nt-RIC11pt fused to the activation domain of GAL4 (GAL4-AD:Nt-RIC11pt) interacted  
363 approximately equally with Nt-RAC1, Nt-RAC3, and Nt-RAC5 fused to the GAL4 DNA-binding domain  
364 (GAL4-DBD), whereby growth of yeasts demonstrating the interaction with Nt-RAC3 was slightly more  
365 pronounced (**Fig.5C**).

366 Taken together, these results suggest that tobacco Nt-RIC11pt is a versatile effector, which has the  
367 capacity to interact with multiple types of RAC-GTPases, what consequently implies association of Nt-RIC11pt  
368 with various cellular pathways. In particular, this suggests involvement in ABA-signalling via Nt-RAC3, and in  
369 pollen tube growth via Nt-RAC1, Nt-RAC5, and Nt-RAC5.2.

370

### 371 **3.6 Nt-RIC11pt interacts with Nt-CAR4**

372 To gain insights which signalling pathways are related to Nt-RIC11pt a Y2H-screen was performed  
373 particularly aiming to identify downstream targets using Nt-RIC11pt as bait. In this screen of a pollen tube  
374 library several cDNAs were identified comprising uncharacterized proteins of unknown function, and  
375 furthermore, a particularly interesting cDNA which encodes a 123 amino acids fragment of a protein belonging  
376 to a family of C2 (protein kinase C conserved region 2) calcium-dependent lipid-binding domain (CaLB domain)  
377 containing proteins (**Fig.6A**). BLAST search revealed that this protein is identical with the computer predicted  
378 sequence of tobacco Nt-CAR4/GAP1 (XP\_016443372) and most closely related to the GTPase-Activating  
379 Proteins GAP1/CAR4 from Arabidopsis (AT3G17980; 76.4% identity) (**Fig.6A**), and Os-GAP1 from *Oryza*  
380 *sativa* (LOC4329192; 55.7% identity) (**Fig.6A**). These unconventional GAP-proteins contain a phospholipid-  
381 binding C2 domain and have been described to play a role in abscisic acid (ABA)-signalling, plant stress  
382 response, as well as TGN-related endomembrane trafficking (Cheung et al., 2013; Diaz et al., 2016; Heo et al.,  
383 2005). The closest human homolog is the *Homo sapiens* C2CD5 protein (C2 domain-containing protein 5)  
384 (EAW96476).

385 Y2H-assays corroborated the result from cDNA library screening and provide clear evidence that Nt-  
386 CAR4 fused to the activation domain of GAL4 (GAL4-AD:Nt-CAR4) interacted specifically with Nt-RIC11pt  
387 fused to the GAL4 DNA-binding domain (GAL4-DBD) (**Fig.6B**).

388 Phylogenetic analysis of the most closely related Arabidopsis and predicted tobacco proteins reveals an  
389 unrooted tree of CAR/GAPs clustering in in five groups (**Fig.6C**). Nt-CAR4 aggregates with Nt-PCCP and At-  
390 GAP1/CAR4 in group I including At-CAR3 and At-CAR5 (**Fig.6C**). Furthermore, the tight clustering of Nt-  
391 CAR11 with AGD11, 12, and 13 clearly demonstrates that CAR/GAPs are closely related to ARF-GAPs  
392 (**Fig.6C**). Remarkably, Nt-CAR4 is most closely related to the pollen-specific C2-domain containing protein  
393 *Nicotiana glauca* Na-PCCP (ACD40010; 85.3% identity) (**Fig.6A**) and the predicted homolog from *Nicotiana*  
394 *tabacum* Nt-PCCP (ACD40018; 84.5% identity) (**Fig.6C**).

## Figure 6

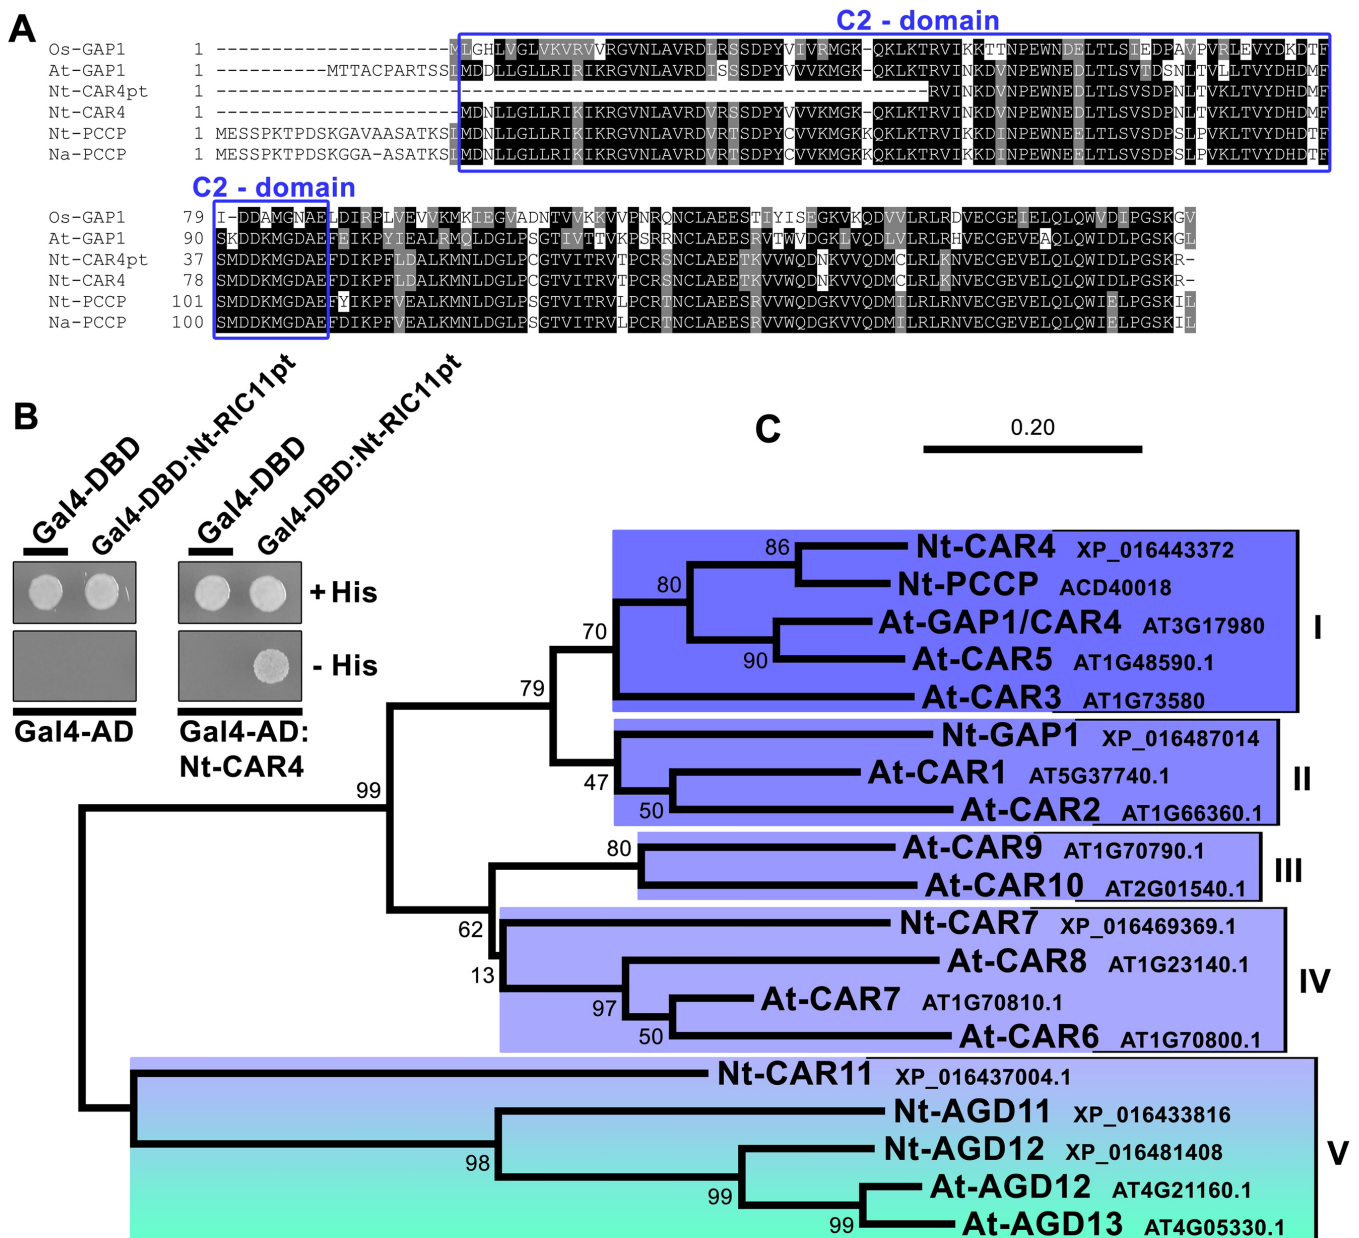

**Figure 6. Yeast Two-Hybrid Assay, Amino Acid Sequence Alignment and Phylogenetic Analysis of the Nt-RIC11pt Interaction Partner Nt-CAR4.**

**(A)** Clustal Omega Amino Acid Sequence Alignment of Nt-CAR4 with closest homologs from *Arabidopsis thaliana* (At), *Nicotiana tabacum* (Nt), *Nicotiana glauca* (Na), and *Oryza sativa* (Os) identified by BLAST search. Black shading: sequence identity; Gray shading: sequence similarity; Blue box: C2-domain.

**(B)** Yeast transformants co-expressing Nt-RIC11pt fused to the DNA binding domain of the GAL4 transcription factor (GAL4-DBD) together with Nt-CAR4 fused to the GAL4 activation domain (GAL4-AD). Yeast single colonies were diluted in water and equal amounts of transformed cells plated on histidine-free culture medium (-His) to analyse for two-hybrid interaction. All transformants were also plated on histidine containing medium (+His) as positive growth control. Controls for specificity of the protein interaction were transformants co-expressing the Nt-CAR4 prey protein with just the GAL4-DBD, as well as transformants co-expressing Nt-RIC11pt bait protein together with just the GAL4-AD.

**(C)** Phylogenetic analysis delineated in an unrooted tree obtained by maximum likelihood estimation and JTT matrix-based model providing protein amino acid sequence relationships between Nt-CAR4 and closest homologs from *Arabidopsis thaliana* and *Nicotiana tabacum*. All members of the CAR-family were classified in V groups (various blue tones) according to their sequence similarity. Notice the remote clustering of Nt-CAR11 (blue) together with the ARF-GAPs AGD11-13 (green) in group V (blue to green shading). Phylogeny reconstruction was generated using 'MEGA-X 10.0.5 software'. The indicated bootstrap values are based on 500 replications and the scale bar for branch lengths indicates the number of amino acid substitutions per site. Locus/Accession number is given for every protein. At: *Arabidopsis thaliana*; Nt: *Nicotiana tabacum*.



395 The multifaceted CAR/GAP-family has the capacity for activating their interacting GTPases, therefore  
396 it is particularly interesting to analyse their relation to other known types of GAPs. For phylogenetic analysis  
397 documented sequences of the various Arabidopsis GTPase Activating Proteins from database were compiled and  
398 classified into three accepted families according to their known or predicted functions (Arf-GAPs, Rho/ROP-  
399 GAPs, Ypt/Rab-GAPs) and were complemented with Arabidopsis as well as tobacco CAR/GAPs. A  
400 phylogenetic tree was constructed using Maximum Likelihood estimation method with 500 bootstrap  
401 replications (**Fig.7**). This phylogenetic tree was generated from amino acid comparison and shows that members  
402 of the CAR/GAP family most tightly cluster and are additionally closely related to the broad distributed family  
403 of Arf-GAPs (ADP-ribosylation factor - GTPase-activating proteins), which form separate dispersed clusters  
404 (**Fig.7**). In particular, Nt-CAR11 is positioned near to Nt-AGD11/12 and At-AGD12/13 what indicates close  
405 relation of CAR/GAPs to the Arf-GAP family (**Fig.6C; 7**). In the displayed tree ARF-GAPs represent the most  
406 loosely clustered GAP-family with At-AGD14 and At-AGD11 being obviously very distantly related, even  
407 adjoining the families of Rho/ROP-GAPs or Ypt/Rab-GAPs (**Fig.7**).  
408  
409  
410

#### 411 **4. DISCUSSION**

412 Plant pollen tubes are highly specialized cell types that reach outstanding growth velocities in order to  
413 transport the male gametes through the pistil to the ovule, therefore it is plausible that this remarkable cell type  
414 evolved pollen-specific molecular signal transduction networks to coordinate the cellular processes essential for  
415 traversing the female tissue.

416 To date, several predominantly pollen tube growth related regulatory proteins have been identified that belong to  
417 various functional categories, such as:

418 I) RAC/ROP-GTPases: At-ROP1 (Li et al., 1998) and Nt-RAC5 (Klahre and Kost, 2006),

419 II) RAC/ROP-effectors which are associated with actin- and membrane-dynamics: At-RIC3 (Gu et al., 2005; Lee  
420 et al., 2008b), Nt-ADF1 (Chen et al., 2003; Chen et al., 2002), Nt-RISAP (Stephan et al., 2014),

421 III) Receptor-like kinases (RLKs): At-ANX1/2 (Boisson-Dernier et al., 2013; Boisson-Dernier et al., 2009), At-  
422 MDIS1-MIK1/2 (Wang et al., 2016), At-PRK6 (Takeuchi and Higashiyama, 2016),

423 IV) The putative GTP-binding protein At-GPR1 (Yang et al., 2017),

424 and V) Zm-CPK32 (Li et al., 2018), which is a calcium-dependent protein kinase that interestingly has been  
425 related to regulation of ABA-signalling.

426 In addition to these known proteins, the present work reveals that the RAC-effector Nt-RIC11pt belongs to such  
427 a preferentially in pollen expressed repertory of signal transduction molecules regulating pollen tube growth.

428 In their effort to isolate all Arabidopsis RIC genes by PCR from cDNA libraries of flowers, seedlings, and  
429 leaves, Wu *et al.* (Wu et al., 2001) state that they could not amplify At-RIC11, what corroborates the observation  
430 that tobacco Nt-RIC11pt is exclusively expressed at high levels in pollen and pollen tubes. However, it cannot be  
431 ruled out that Nt-RIC11pt might also be expressed in other tissues at minor levels below the detection limit of  
432 utilized qRT-PCR.

433 The presented phylogenetic analyses show that Arabidopsis and tobacco RICs cluster together in 5  
434 groups corresponding to the ones described by Wu *et al.* (Wu et al., 2001), whereby Nt-RIC11pt is categorized  
435 herein as a member of group I RICs (**Fig.2C**), whose functions have not been characterized to date.

## Figure 7

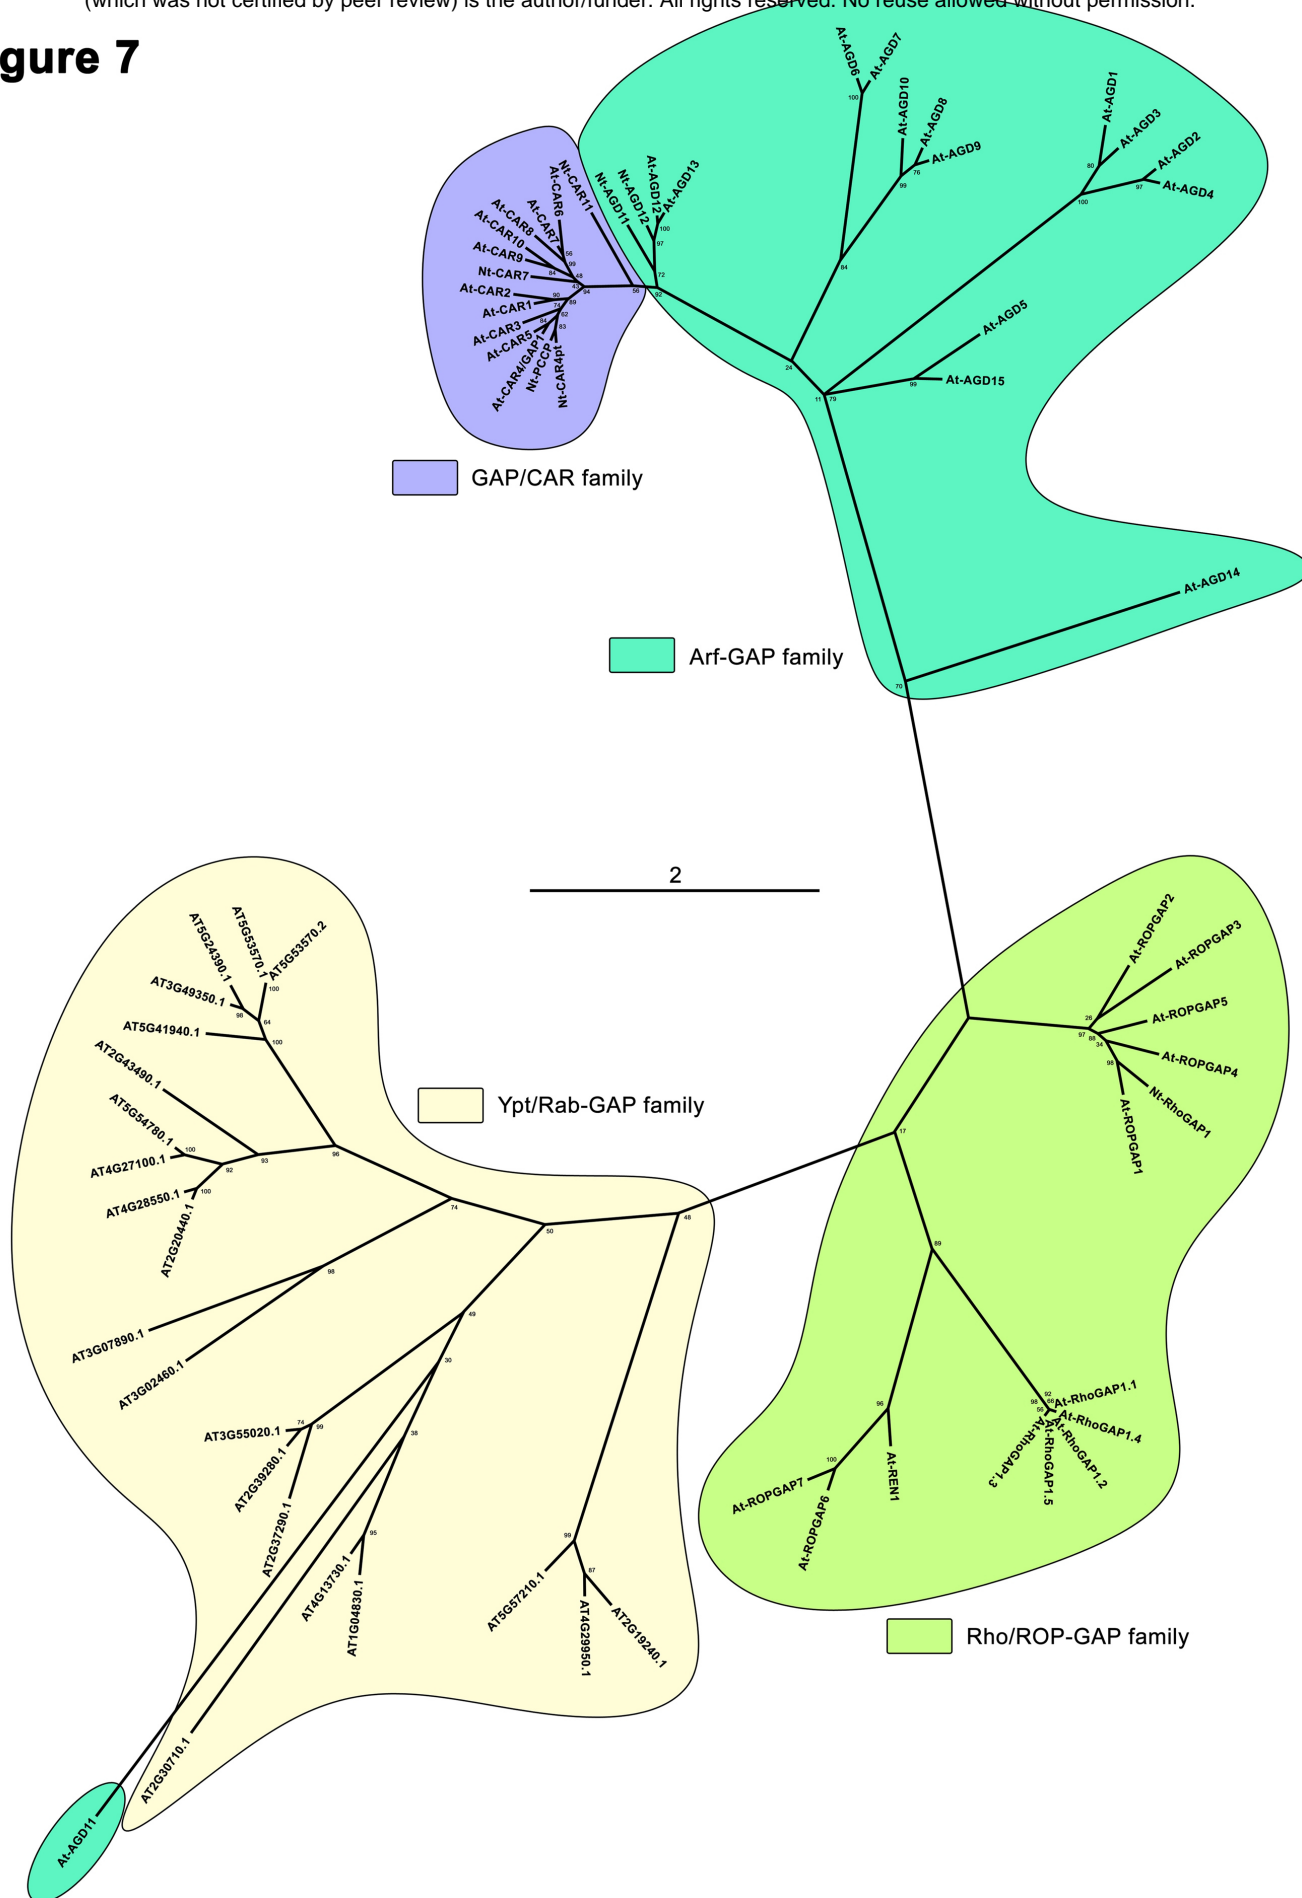

**Figure 7. Phylogenetic Comparison of the CAR/GAP-family with known Arf-GAPs, Rho/ROP-GAPs and Ypt/Rab-GAPs.**

Phylogenetic analysis delineated in an unrooted tree obtained by maximum likelihood estimation and JTT matrix-based model providing protein amino acid sequence relationships between the CAR/GAP-family and known Arf-GAPs, Rho/ROP-GAPs and Ypt/Rab-GAPs. The CAR/GAP-family comprises known *Arabidopsis thaliana* proteins, Nt-CAR4pt, and computer predictions of *Nicotiana tabacum* from database search. Phylogeny reconstruction was generated using 'MEGA-X 10.0.5 - software'. The indicated bootstrap values are based on 500 replications and the scale bar for branch lengths indicates the number of amino acid substitutions per site. Locus/Accession number is given for every protein. At: *Arabidopsis thaliana*; Nt: *Nicotiana tabacum*.

#### 436 **4.1 Multifaceted RIC-RAC binding**

437 It should be highlighted that data submitted in this work provide first evidence for interactions between  
438 RIC11 and different active RAC/ROP-GTPases from diverse phylogenetic groups performing individual  
439 functions. In particular, the unrooted tree in **figure 5D** shows that Nt-RAC3 clusters with At-ROP11 and At-  
440 ROP10 which both fulfil functions in ABA-signalling (Li et al., 2012a; Zheng et al., 2002). Whereas Nt-RAC1,  
441 Nt-RAC5, NtRAC5.2 group together with At-ROP1, At-ROP3, and At-ROP5, which have a role in actin  
442 dynamics and endomembrane traffic thus contributing to pollen tube growth (Feng et al., 2016; Gu et al., 2005;  
443 Lee et al., 2008b; Nibau et al., 2006). The specific involvement in these pollen tube growth related processes has  
444 been experimentally demonstrated for Nt-RAC1 (Chen et al., 2003) and Nt-RAC5 (Klahre et al., 2006; Stephan  
445 et al., 2014).

446 This allows the intriguing interpretation that RIC11 is a versatile effector representing a connective network hub  
447 which is involved in signal transduction to various plant pathways. Reports presenting data for other RICs  
448 support these findings, as they show that At-ROP1 binds to a range of 7 RICs (Wu et al., 2001), concluding that  
449 At-ROP1 thereby coordinates even antagonistic cellular processes, as for instance, in the case of RIC3 and RIC4  
450 which are counteracting in actin dynamics during polarized tip growth of pollen tubes (Gu et al., 2005; Lee et al.,  
451 2008b). Additionally, RIC1 has been described to be involved in two different processes, namely actin filament  
452 severing in the pollen tube tip (Zhou et al., 2015), as well as microtubule organization in pavement cells (Fu et  
453 al., 2005).

454 The presented data in combination with observations of Wu *et al.* (Wu et al., 2001) and above  
455 mentioned studies allow to hypothesize that presumably every RIC might interact with every ROP. In this  
456 context, it is noteworthy that Arabidopsis expresses 11 ROPs and an equal number of RICs. If, by implication,  
457 RICs bind comprehensively to all ROPs this would constitute an interconnected RIC-ROP network, for which  
458 their highly conserved CRIB-domain might be the central binding-element. In this case the important question  
459 arises of how respective pathway-specificity is particularly attained additionally to the general CRIB-based  
460 interaction? There are several answers to this intriguing question.

461 Based on the high degree of conservation between CRIB-domains each RIC-family member holds the  
462 potential to bind all ROPs, however, heterogeneous flanking sequences adjacent to the CRIB-domain likely  
463 mediate differentiated interaction to individual ROPs (Thompson et al., 1998). The sequence alignments show  
464 that Nt-RIC1 1pt has several candidate sequences for this purpose. The high sequence diversity among RIC-  
465 family members outside of their highly conserved CRIB domain suggests the existence of various structural  
466 features potentially mediating differential interaction to different RACs or downstream targets. Most  
467 particularly, presented pull down data clearly demonstrate differential RIC-RAC binding, because Nt-RIC1 1pt  
468 interacts equally strong with RAC1, RAC5, and RAC5.2, whereas the affinity to RAC3 is approximately two  
469 fold higher. This might be caused by differential interacting domains, although it remains unclear which residues  
470 mediate the selective binding capacity of Nt-RIC1 1pt to diverse RACs.

471 In this context, the small and also highly conserved RAC-sequences must be diverse enough to contain elements  
472 mediating RIC specificity. It has to be highlighted, that various distinct regions outside of switch regions I and  
473 II in RAC-GTPases are known to be required to make contact to effector proteins (Bishop and Hall, 2000) and  
474 thus could potentially contribute to differential RIC-RAC binding.

475 Another potential specificity determinant might be post-translational modification of Nt-RIC1 1pt, for  
476 example combinatorial phosphorylation of its exceptional multitudinous serine/threonine residues, possibly

477 through calcium-dependent protein kinases (CDPKs) which have been shown to be involved in abscisic acid  
478 (ABA)-mediated physiological processes (Mori et al., 2006; Zhu et al., 2007).

479 Furthermore, additional interaction partners might mediate pathway specificity, however, the presented  
480 *in vitro* pull down experiments verify a basic difference in the direct interaction between the various purified  
481 RACs and RIC11.

482 Most importantly, the *in vivo* localization analysis substantiated a universal cytoplasmic distribution of  
483 RIC11 what represents the essential characteristic for interaction with a wide-range of RACs. Consequently, the  
484 individual RAC-localization would determine the area of action for RIC11 and thus the affected pathway. In this  
485 case, simply the homogeneous cellular abundance of RIC11 would collectively involve various downstream  
486 events, what hence depicts RIC11 as interface for multiple RAC-dependent processes.

487 Besides that, the universal binding of RIC to different RACs could simply be interpreted as a backup  
488 system in which RICs are functionally redundant and potentially replace each other. However, this requires  
489 versatile binding not only to different GTPases but even to the diverse downstream targets. This would depict  
490 RICs as promiscuous and highly unspecific effectors, raising the issue why there are so many different types of  
491 RICs in one cell at all?

492 In any case, to fulfil its role as a universal switch of functionally diverse RACs, RIC11 would be toggled to the  
493 respective pathway and subsequently serve as a mediator to specific downstream regulators, such as CAR4.

494

#### 495 **4.2 What is the significance of CAR4-RIC11 interaction?**

496 Nt-CAR4/GAP1 belongs to a poorly characterized family of ten C2-domain ABA-related (CAR)  
497 proteins which have been described to bind phospholipid membranes in a  $Ca^{2+}$ -dependent manner and play roles  
498 in signal transduction based upon additional catalytic-activities, such as GAP-activity, kinase-activity, and  
499 mediation of protein-protein interactions (Diaz et al., 2016). In particular, members of the CAR-family recruit  
500 the pyrabactin resistance 1/PYR1-like (PYR/PYL) ABA-receptors to the membrane (Diaz et al., 2016;  
501 Rodriguez et al., 2014). The finding of Nt-RIC11pt interacting with ABA-related RAC3 and additionally Nt-  
502 CAR4/GAP1, which is associated with the PYR/PYL-receptor, indicates a role in the ABA-receptor pathway in  
503 pollen tubes.

504 The homologs of Nt-CAR4/GAP1, namely At-GAP1 and Os-GAP1 show both GTPase/ATPase  
505 activities and phospholipid binding capacities (Cheung et al., 2013; Cheung et al., 2010). Interestingly, the  
506 presented phylogenetic analyses demonstrate that CAR/GAPs tightly cluster as a distinct lateral arm closely  
507 linked to the broad family of diverse structured Arf-GAPs, which analogously to CAR/GAPs are multifunctional  
508 in addition to their Arf-GAP activity, and have domains that differ from those of other GAPs. In contrast to  
509 classical RhoGAPs, such as Nt-RhoGAP1 (Klahre and Kost, 2006), the protein sequences of CAR/GAPs  
510 apparently contain no intrinsic CRIB-domain, which in classical RhoGAPs is responsible for ROP-binding and  
511 required for efficient GAP activity (Klahre and Kost, 2006; Schaefer et al., 2011; Wu et al., 2000). Therefore the  
512 present work suggests that the effector RIC11 fulfils the function of recruiting CAR4/GAP1 to the respective  
513 RAC/ROP-GTPase.

514 Os-GAP1 and At-GAP1 have been described to be involved in plant stress and defence response by  
515 stimulating GTPase-activity of the unconventional G-protein YchF1, which belongs to the poorly characterized  
516 YchF-type family with largely unknown functions (Cheung et al., 2013; Cheung et al., 2008). Noteworthy is that

517 Os-GAP1 has been connected to TGN-related endomembrane transport by regulating Os-Rab8a and Os-Rab11  
518 (Heo et al., 2005; Son et al., 2013).

519 Additionally, the CAR4-homolog Na-PCCP is a pollen-specific protein that associates with signal  
520 proteins from extracellular matrix (ECM) of the pistil (Lee et al., 2008a). The C-terminal region of Na-PCCP  
521 binds to arabinogalactan proteins which are endocytosed from ECM of the pistil and have a function in  
522 promoting pollen tube growth by providing a chemical guidance signal (Lee et al., 2009; Lee et al., 2008a). This  
523 allows to hypothesize that the RIC11-CAR4 interaction might contribute to pistil-pollen crosstalk, and moreover,  
524 implicates a potential role in endomembrane transport, because the C2-domain of Na-PCCP associates with the  
525 plasma membrane and the endosomal system (Lee et al., 2009).

526 CAR proteins are partially cytosolic localized calcium sensors with basic membrane association that  
527 upon increase of Ca<sup>2+</sup>-level is enhanced through structural rearrangement of the cell membrane induced by  
528 CARs (Diaz et al., 2016). Furthermore, it has been proposed that CARs might act as a scaffold proteins that  
529 recruit interaction partners like PYR/PYL-receptors to signalling platforms in specific plasma membrane  
530 domains (Diaz et al., 2016). Thus, a minor fraction of the cytoplasmic RIC11-population might be transiently  
531 associated with subdomains of the plasma membrane via interaction with CAR4 and membrane bound RAC3.  
532 Correspondingly, the function of At-ROP10 and At-ROP11 in PYL/PYR-related ABA-signalling is modulated  
533 by intracellular calcium levels (Li et al., 2012a; Mori et al., 2006; Zhu et al., 2007). In this context, the tip-  
534 directed calcium gradient of pollen tubes, which is a prerequisite for elongation (Steinhorst and Kudla, 2013),  
535 potentially causes an equivalent aligned accumulation of the calcium sensor CAR4 in the plasma membrane,  
536 where RIC11 could establish spatial contact to membrane-bound RACs. However, an apical accumulation of  
537 CAR4 in the tube plasma membrane, and the subcellular interaction site with RIC11 remains to be substantiated.

538

### 539 **4.3 Which cellular processes are targeted by RIC11?**

540 In this context binding to RAC1 and RAC5 implies a role in endomembrane transport and actin-  
541 remodelling during polarized pollen tube growth (Chen et al., 2003; Kost, 2008; Stephan, 2017). It has to be  
542 highlighted that Nt-RIC11 most significantly interacts with Nt-RAC3 which is the tobacco homolog of At-  
543 ROP10, and additionally, Nt-RAC3 phylogenetically closely clusters with At-ROP9 and At-ROP11 (**Fig.5D**),  
544 what synoptically suggests a role in ABA-signalling of pollen tubes. Interestingly, the few non plant homologs  
545 of RIC11 are either related to rearrangement of the actin cytoskeleton as the Cdc42-effector WASP from *Homo*  
546 *sapiens* (Kim et al., 2000), or are particularly involved in pheromone response and pseudohyphal/invasive  
547 growth as *Saccharomyces cerevisiae* STE20 (Leberer et al., 1992).

548 In this context, several studies show that ROPs are important factors in cellular response to plant hormones, in  
549 particular Arabidopsis ROP2, ROP6, ROP9, ROP10, and ROP11 are related with ABA-signalling (**Fig.5D**  
550 green), affecting seed germination, root elongation, stomatal closure, and embryo development (Lemichez et al.,  
551 2001; Li et al., 2001; Li et al., 2012a; Nibau et al., 2013; Zheng et al., 2002). Most interestingly, transgenic  
552 expression of constitutive active ROP10 in Arabidopsis reduces ABA-response and consistently a *rop10* null  
553 mutant is hypersensitive to ABA (Zheng et al., 2002). Similar results for At-ROP11 (Li et al., 2012a) show that  
554 it acts in parallel with At-ROP10 as a negative regulator of multiple ABA-responses. In contrast, At-ROP9 has  
555 been reported to act antagonistically to ROP10 and ROP11 in abscisic acid signalling during embryo  
556 development and lateral root formation (Nibau et al., 2013).

557 In this regard, it is also worth noting that all cluster members, namely ROP9, ROP10, and ROP11 belong to a  
558 subgroup of RAC/ROP-GTPases, which specifically evolved only in vascular plants (Winge et al., 2000), hence  
559 implicating that Nt-RIC11 gained its function with the emergence of complex land plants, what in turn  
560 corresponds to the observation that Nt-RIC11 is expressed pollen-specific.

561 Directional pollen tube growth is susceptible to molecular factors that are exchanged between the  
562 female pistil and the pollen tube, such as small secreted proteins, which play a role in pollen tube adhesion and  
563 guidance (Chae and Lord, 2011). In addition, other exogenous molecules, as the phytohormone ABA might  
564 potentially influence tube elongation *in vivo*, however, a related role for ABA has not been studied in depth.  
565 Some studies provide evidence, that according to its concentration ABA effects positive and negative changes in  
566 growth velocity of the male gametophyte (Dhawan and Malik, 1981; Frascaroli and Tuberosa, 1993; Malik and  
567 Chhabra, 1976; Wu et al., 2008; Yang et al., 2003). Low exogenous ABA levels promote tube growth what  
568 correlates with falling ABA concentration in the female tissue upon flowering and pollination (Kojima et al.,  
569 1993). In accordance therewith, ROP10 gates the expression of genes that are specific to low concentrations of  
570 ABA (Xin et al., 2005). Furthermore, Kovaleva *et al.* (Kovaleva et al., 2016) show that ABA-induced lateral  
571 redistribution of H<sup>+</sup>-ATPase into the subapical zone of pollen tubes and increased the content of microfilaments  
572 accompanied by a redistribution of F-actin to apical zone. This demonstrates a role for ABA in remodelling of  
573 the subcellular tip-composition.

574 Taken together, this study suggests that Nt-RIC11pt acts as a potential network hub between Nt-RAC1-,  
575 Nt-RAC5-, and Nt-RAC3-related pathways, thus coordinating actin-dynamics and endomembrane transport with  
576 ABA-signalling during pollen tube growth (**Fig.8**). In this context it is hypothesized that ABA-response in  
577 tobacco pollen tubes may be positively affected through deactivation of the ROP10-homolog Nt-RAC3 via  
578 recruitment of Nt-CAR4/GAP1 by Nt-RIC11pt (**Fig.8**). In concordance therewith, it has been shown that Feronia  
579 suppresses ABA-response via GEFs that activate ROP10, which in turn, activates ABI2 (Yu et al., 2012; Zhao et  
580 al., 2015).

581 It has to be mentioned that only few functions have been specified to date for any of the Arabidopsis  
582 RICs that phylogenetically cluster in group I (**Fig.2C**). Interestingly, Wu *et al.* (Wu et al., 2001) state that RIC10  
583 promotes pollen tube growth. Furthermore, concerning the involvement of other RICs in ABA-signalling some  
584 data exist. For instance, LLP-12-2 from *Lilium longiflorum*, which is a homolog of At-RIC6 belongs to RICs of  
585 group III (Data not shown) (Hsu et al., 2010) and has been identified as effector of LLP-ROP1, an At-ROP1  
586 homolog (Hsu et al., 2010). Interestingly, in *Lilium* pollen tubes LLP-ROP1 and its effector LLP-12-2  
587 antagonistically respond to exogenous ABA application (Hsu et al., 2010).

588 Additionally, the well-characterized At-RIC1, which is expressed in many Arabidopsis tissues, has been reported  
589 to suppress ABA-response in germinating seeds and growing roots (Choi et al., 2013). However, Choi *et al.*  
590 (Choi et al., 2013) do not assign any ROP to the ABA-related function of At-RIC1, but they additionally state  
591 that the observed moderate phenotype of their *ric1* mutants might be explained by an involvement of other RICs  
592 in ABA-signal transduction.

593

#### 594 **4.4 Epilogue**

595 Besides the reported counter-action of two RIC-effectors (Gu et al., 2005; Hwang et al., 2005; Wu et al.,  
596 2001), the present study provides an additional mechanism whereby RIC11 might join together both functions, a  
597 recruitment of active RAC to target complexes, as well as deactivation by relaying GAP-activity, thus mediating

598 negative feedback (**Fig.8**). Therefore, the reported RAC-RIC11-CAR4 network provides another mode of  
599 RAC/ROP-GTPase control in addition to classical Rho-GAPs and guanine-nucleotide-dissociation inhibitors  
600 (GDIs).

601           Altogether, the current data allow to postulate RIC11 as a multifaceted scaffold with differential binding  
602 efficiency to RAC/ROPs, performing effector-functions by mediating signals to various downstream pathways,  
603 as well as regulator-functions by additionally relaying negative feedback to GTPases (**Fig.8**).  
604 Furthermore, its eclectic interaction capacity opens up the possibility that RIC11 is a network hub  
605 interconnecting cytoskeleton dynamics, membrane transport processes, and ABA-controlled cellular water  
606 balance, which altogether control pollen tube elongation most likely in a coordinated manner.

607  
608  
609

## 610 **5. ACKNOWLEDGEMENT**

611 I would like to thank Hildegard Stephan for comments and discussions.

612  
613  
614

## 615 **6. CONFLICT OF INTEREST**

616 The author declares that there are no conflicts of interest.

617  
618  
619  
620  
621  
622  
623  
624  
625  
626  
627  
628  
629  
630  
631  
632  
633  
634  
635  
636  
637  
638

Figure 8

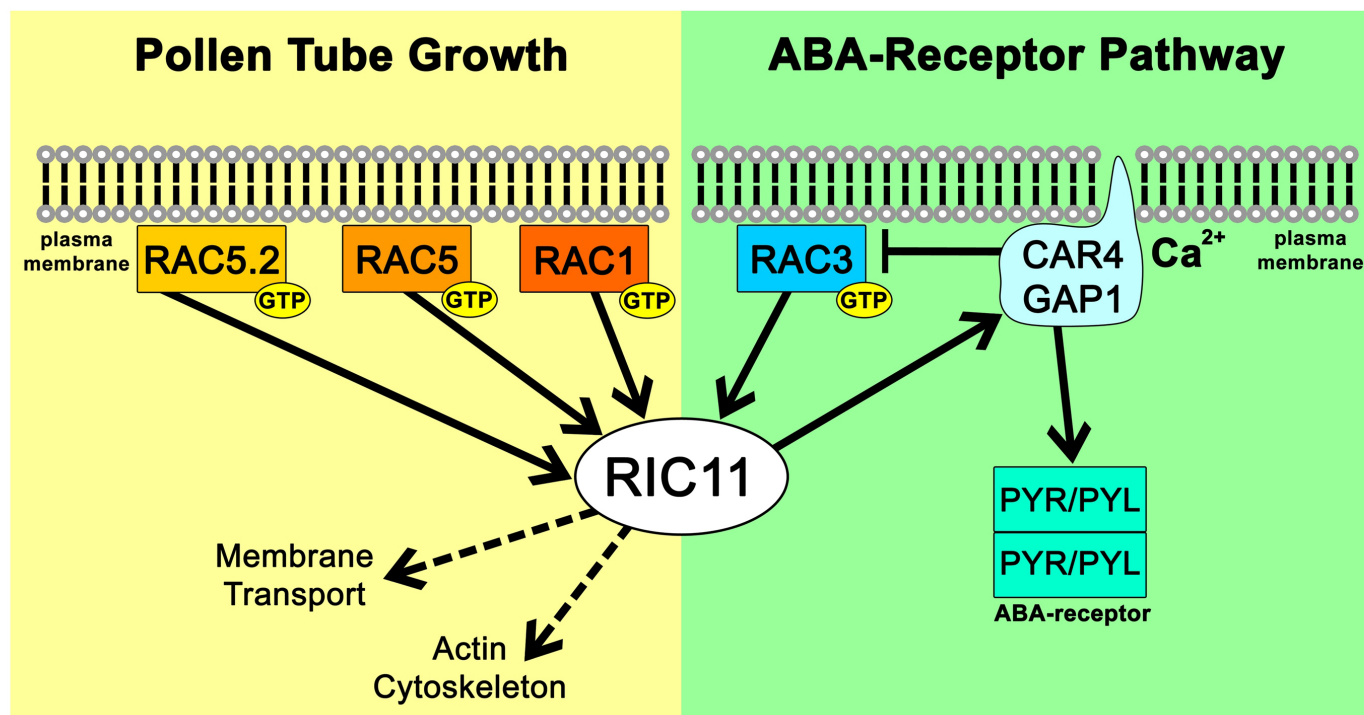

Figure 8. Graphical Overview of RIC11 Interaction Network.

Schematic view of the RIC11 interaction network, including different RACs and CAR4/GAP1. The connection RAC3-RIC11-CAR4/GAP1 provides a link to the related PYR/PYL-homodimer, thus establishing a role in ABA-response. Cytoplasmic RIC11 indirectly mediates GAP-activity to membrane-associated RAC3 by recruitment of the unusual membrane-bound CAR4/GAP1. Ca<sup>2+</sup>-dependent membrane association of CAR4/GAP1 establishes a connection to the intracellular calcium gradient, which is a prerequisite for pollen tube growth. Solid arrows indicate steps supported by experimental data described in this paper and additional cited studies (Cheung et al., 2013; Cheung et al., 2008; Diaz et al., 2016; Rodriguez et al., 2014), whereas dotted arrows indicate implicated more putative relations based on other currently available data (Stephan et al., 2014).



## 7. REFERENCES

- Abdul-Manan N, Aghazadeh B, Liu GA, Majumdar A, Ouerfelli O, Siminovitch KA, Rosen MK. 1999.** Structure of Cdc42 in complex with the GTPase-binding domain of the 'Wiskott-Aldrich syndrome' protein. *Nature*, **399**: 379-83.
- Bardwell L. 2005.** A walk-through of the yeast mating pheromone response pathway. *Peptides*, **26**: 339-50.
- Bascom C, Jr., Burkart GM, Mallett DR, O'Sullivan JE, Tomaszewski AJ, Walsh K, Bezanilla M. 2019.** Systematic survey of the function of ROP regulators and effectors during tip growth in the moss *Physcomitrella patens*. *Journal of Experimental Botany*, **70**: 447-457.
- Berken A, Wittinghofer A. 2008.** Structure and function of Rho-type molecular switches in plants. *Plant Physiology & Biochemistry*, **46**: 380-93.
- Bishop AL, Hall A. 2000.** Rho GTPases and their effector proteins. *Biochemical Journal*, **348 Pt 2**: 241-55.
- Boisson-Dernier A, Lituiev DS, Nestorova A, Franck CM, Thirugnanarajah S, Grossniklaus U. 2013.** ANXUR receptor-like kinases coordinate cell wall integrity with growth at the pollen tube tip via NADPH oxidases. *PLoS Biol*, **11**: e1001719.
- Boisson-Dernier A, Roy S, Kritsas K, Grobei MA, Jaciubek M, Schroeder JI, Grossniklaus U. 2009.** Disruption of the pollen-expressed FERONIA homologs ANXUR1 and ANXUR2 triggers pollen tube discharge. *Development*, **136**: 3279-88.
- Borg S, Podenphant L, Jensen TJ, Poulsen C. 1999.** Plant cell growth and differentiation may involve GAP regulation of Rac activity. *FEBS Letters*, **453**: 341-5.
- Boureux A, Vignal E, Faure S, Fort P. 2007.** Evolution of the Rho family of ras-like GTPases in eukaryotes. *Molecular Biology and Evolution*, **24**: 203-16.
- Brembu T, Winge P, Bones AM, Yang Z. 2006.** A RHOse by any other name: a comparative analysis of animal and plant Rho GTPases. *Cell Research*, **16**: 435-45.
- Chae K, Lord EM. 2011.** Pollen tube growth and guidance: roles of small, secreted proteins. *Annals of Botany*, **108**: 627-36.
- Chen CY, Cheung AY, Wu HM. 2003.** Actin-depolymerizing factor mediates Rac/Rop GTPase-regulated pollen tube growth. *The Plant Cell*, **15**: 237-49.
- Chen CY, Wong EI, Vidali L, Estavillo A, Hepler PK, Wu HM, Cheung AY. 2002.** The regulation of actin organization by actin-depolymerizing factor in elongating pollen tubes. *Plant Cell*, **14**: 2175-90.
- Cheung MY, Li MW, Yung YL, Wen CQ, Lam HM. 2013.** The unconventional P-loop NTPase OsYchF1 and its regulator OsGAP1 play opposite roles in salinity stress tolerance. *Plant, Cell and Environment*, **36**: 2008-20.
- Cheung MY, Xue Y, Zhou L, Li MW, Sun SS, Lam HM. 2010.** An ancient P-loop GTPase in rice is regulated by a higher plant-specific regulatory protein. *The Journal of Biological Chemistry*, **285**: 37359-69.
- Cheung MY, Zeng NY, Tong SW, Li WY, Xue Y, Zhao KJ, Wang C, Zhang Q, Fu Y, Sun Z, Sun SS, Lam HM. 2008.** Constitutive expression of a rice GTPase-activating protein induces defense responses. *New Phytologist*, **179**: 530-45.
- Choi Y, Lee Y, Kim SY, Lee Y, Hwang JU. 2013.** Arabidopsis ROP-interactive CRIB motif-containing protein 1 (RIC1) positively regulates auxin signalling and negatively regulates abscisic acid (ABA) signalling during root development. *Plant, Cell and Environment*, **36**: 945-55.
- Dhawan AK, Malik CP. 1981.** Effect of Growth Regulators and Light on Pollen Germination and Pollen Tube Growth in *Pinus roxburghii* Sarg. *Annals of Botany*, **47**: 239-248.
- Diaz M, Sanchez-Barrena MJ, Gonzalez-Rubio JM, Rodriguez L, Fernandez D, Antoni R, Yunta C, Belda-Palazon B, Gonzalez-Guzman M, Peirats-Llobet M, Menendez M, Boskovic J, Marquez JA, Rodriguez PL, Albert A. 2016.** Calcium-dependent oligomerization of CAR proteins at cell membrane modulates ABA signaling. *Proceedings of the National Academy of Sciences U S A*, **113**: E396-405.
- Dorjgotov D, Jurca ME, Fodor-Dunai C, Szucs A, Otvos K, Klement E, Biro J, Feher A. 2009.** Plant Rho-type (Rop) GTPase-dependent activation of receptor-like cytoplasmic kinases in vitro. *FEBS Letters*, **583**: 1175-82.
- Feig LA. 1999.** Tools of the trade: use of dominant-inhibitory mutants of Ras-family GTPases. *Nature Cell Biology*, **1**: E25-7.
- Feiguelman G, Fu Y, Yalovsky S. 2018.** ROP GTPases Structure-Function and Signaling Pathways. *Plant Physiology*, **176**: 57-79.
- Feng QN, Kang H, Song SJ, Ge FR, Zhang YL, Li E, Li S, Zhang Y. 2016.** Arabidopsis RhoGDIs Are Critical for Cellular Homeostasis of Pollen Tubes. *Plant Physiology*, **170**: 841-56.
- Frascaroli E, Tuberosa R. 1993.** Effect of abscisic acid on pollen germination and tube growth of maize genotypes. *Plant Breeding*, **110**: 250-254.
- Fu Y, Gu Y, Zheng Z, Wasteneys G, Yang Z. 2005.** Arabidopsis interdigitating cell growth requires two antagonistic pathways with opposing action on cell morphogenesis. *The Cell*, **120**: 687-700.

- Gancedo JM. 2001.** Control of pseudohyphae formation in *Saccharomyces cerevisiae*. *FEMS Microbiol Rev*, **25**: 107-23.
- Gu Y, Fu Y, Dowd P, Li S, Vernoud V, Gilroy S, Yang Z. 2005.** A Rho family GTPase controls actin dynamics and tip growth via two counteracting downstream pathways in pollen tubes. *The Journal of Cell Biology*, **169**: 127-38.
- Gu Y, Li S, Lord EM, Yang Z. 2006.** Members of a novel class of Arabidopsis Rho guanine nucleotide exchange factors control Rho GTPase-dependent polar growth. *The Plant Cell*, **18**: 366-81.
- Gu Y, Wang Z, Yang Z. 2004.** ROP/RAC GTPase: an old new master regulator for plant signaling. *Current Opinion in Plant Biology*, **7**: 527-36.
- Hakoshima T, Shimizu T, Maesaki R. 2003.** Structural basis of the Rho GTPase signaling. *Journal of Biochemistry*, **134**: 327-31.
- Hazak O, Bloch D, Poraty L, Sternberg H, Zhang J, Friml J, Yalovsky S. 2010.** A rho scaffold integrates the secretory system with feedback mechanisms in regulation of auxin distribution. *PLoS Biology*, **8**: e1000282.
- Hazak O, Obolski U, Prat T, Friml J, Hadany L, Yalovsky S. 2014.** Bimodal regulation of ICR1 levels generates self-organizing auxin distribution. *Proceedings of the National Academy of Sciences U S A*, **111**: E5471-9.
- Heo JB, Rho HS, Kim SW, Hwang SM, Kwon HJ, Nahm MY, Bang WY, Bahk JD. 2005.** OsGAP1 functions as a positive regulator of OsRab11-mediated TGN to PM or vacuole trafficking. *Plant Cell Physiology*, **46**: 2005-18.
- Hodge RG, Ridley AJ. 2016.** Regulating Rho GTPases and their regulators. *Nature Reviews Molecular Cell Biology*, **17**: 496-510.
- Hsu SW, Cheng CL, Tzen TC, Wang CS. 2010.** Rop GTPase and its target Cdc42/Rac-interactive-binding motif-containing protein genes respond to desiccation during pollen maturation. *Plant Cell Physiology*, **51**: 1197-209.
- Hwang JU, Gu Y, Lee YJ, Yang Z. 2005.** Oscillatory ROP GTPase activation leads the oscillatory polarized growth of pollen tubes. *Molecular Biology of the Cell*, **16**: 5385-99.
- Jaffe AB, Hall A. 2005.** Rho GTPases: biochemistry and biology. *Annu Rev Cell Dev Biol*, **21**: 247-69.
- Kahn RA, Der CJ, Bokoch GM. 1992.** The ras superfamily of GTP-binding proteins: guidelines on nomenclature. *The FASEB Journal*, **6**: 2512-3.
- Kieffer F, Elmayan T, Rubier S, Simon-Plas F, Dagher MC, Blein JP. 2000.** Cloning of Rac and Rho-GDI from tobacco using an heterologous two-hybrid screen. *Biochimie*, **82**: 1099-105.
- Kim AS, Kakalis LT, Abdul-Manan N, Liu GA, Rosen MK. 2000.** Autoinhibition and activation mechanisms of the Wiskott-Aldrich syndrome protein. *Nature*, **404**: 151-8.
- Kjos I, Vestre K, Guadagno NA, Borg Distefano M, Progidia C. 2018.** Rab and Arf proteins at the crossroad between membrane transport and cytoskeleton dynamics. *Biochimica et Biophysica Acta (BBA) - Molecular Cell Research*, **1865**: 1397-1409.
- Klahre U, Becker C, Schmitt AC, Kost B. 2006.** Nt-RhoGDI2 regulates Rac/Rop signaling and polar cell growth in tobacco pollen tubes. *The Plant Journal*, **46**: 1018-31.
- Klahre U, Kost B. 2006.** Tobacco RhoGTPase ACTIVATING PROTEIN1 spatially restricts signaling of RAC/Rop to the apex of pollen tubes. *The Plant Cell*, **18**: 3033-46.
- Kojima K, Kuraishi S, Sakurai N, Fusao K. 1993.** Distribution of abscisic acid in different parts of the reproductive organs of tomato. *Scientia Horticulturae*, **56**: 23-30.
- Kost B. 2008.** Spatial control of Rho (Rac-Rop) signaling in tip-growing plant cells. *Trends in Cell Biology*, **18**: 119-27.
- Kovaleva LV, Voronkov AS, Zakharova EV, Minkina YV, Timofeeva GV, Andreev IM. 2016.** Exogenous IAA and ABA Stimulate Germination of Petunia Male Gametophyte by Activating Ca(2+)-Dependent K(+)-Channels and by Modulating the Activity of Plasmalemma H(+)-ATPase and Actin Cytoskeleton. *Ontogeny*, **47**: 138-51.
- Lavy M, Bloch D, Hazak O, Gutman I, Poraty L, Sorek N, Sternberg H, Yalovsky S. 2007.** A Novel ROP/RAC effector links cell polarity, root-meristem maintenance, and vesicle trafficking. *Current Biology*, **17**: 947-52.
- Leberer E, Dignard D, Harcus D, Thomas DY, Whiteway M. 1992.** The protein kinase homologue Ste20p is required to link the yeast pheromone response G-protein beta gamma subunits to downstream signalling components. *The EMBO Journal*, **11**: 4815-24.
- Lee CB, Kim S, McClure B. 2009.** A pollen protein, NaPCCP, that binds pistil arabinogalactan proteins also binds phosphatidylinositol 3-phosphate and associates with the pollen tube endomembrane system. *Plant Physiology*, **149**: 791-802.
- Lee CB, Swatek KN, McClure B. 2008a.** Pollen proteins bind to the C-terminal domain of *Nicotiana glauca* pistil arabinogalactan proteins. *The Journal of Biological Chemistry*, **283**: 26965-73.

- Lee YJ, Szumlanski A, Nielsen E, Yang Z. 2008b.** Rho-GTPase-dependent filamentous actin dynamics coordinate vesicle targeting and exocytosis during tip growth. *The Journal of Cell Biology*, **181**: 1155-68.
- Lemichez E, Wu Y, Sanchez JP, Mettouchi A, Mathur J, Chua NH. 2001.** Inactivation of AtRac1 by abscisic acid is essential for stomatal closure. *Genes & Development*, **15**: 1808-16.
- Li H, Shen JJ, Zheng ZL, Lin Y, Yang Z. 2001.** The Rop GTPase switch controls multiple developmental processes in Arabidopsis. *Plant Physiology*, **126**: 670-84.
- Li H, Wu G, Ware D, Davis KR, Yang Z. 1998.** Arabidopsis Rho-related GTPases: differential gene expression in pollen and polar localization in fission yeast. *Plant Physiology*, **118**: 407-17.
- Li J, Li Y, Deng Y, Chen P, Feng F, Chen W, Zhou X, Wang Y. 2018.** A calcium-dependent protein kinase, ZmCPK32, specifically expressed in maize pollen to regulate pollen tube growth. *PLoS One*, **13**: e0195787.
- Li S, Gu Y, Yan A, Lord E, Yang ZB. 2008.** RIP1 (ROP Interactive Partner 1)/ICR1 marks pollen germination sites and may act in the ROP1 pathway in the control of polarized pollen growth. *Molecular Plant*, **1**: 1021-35.
- Li Z, Kang J, Sui N, Liu D. 2012a.** ROP11 GTPase is a negative regulator of multiple ABA responses in Arabidopsis. *Journal of Integrative Plant Biology*, **54**: 169-79.
- Li Z, Li Z, Gao X, Chinnusamy V, Bressan R, Wang ZX, Zhu JK, Wu JW, Liu D. 2012b.** ROP11 GTPase negatively regulates ABA signaling by protecting ABI1 phosphatase activity from inhibition by the ABA receptor RCAR1/PYL9 in Arabidopsis. *J Integr Plant Biol*, **54**: 180-8.
- Malik CP, Chhabra N. 1976.** Hormonal regulation of pollen germination and pollen tube elongation in *Arachis hypogea* Reitz. *Proceedings of the Indian Academy of Sciences - Section B*, **84**: 101-108.
- Matsuura Y. 2016.** Mechanistic Insights from Structural Analyses of Ran-GTPase-Driven Nuclear Export of Proteins and RNAs. *Journal of Molecular Biology*, **428**: 2025-39.
- Memon AR. 2004.** The role of ADP-ribosylation factor and SAR1 in vesicular trafficking in plants. *Biochimica et Biophysica Acta (BBA) - Molecular Cell Research*, **1664**: 9-30.
- Molendijk AJ, Ruperti B, Singh MK, Dovzhenko A, Ditengou FA, Milia M, Westphal L, Rosahl S, Soellick TR, Uhrig J, Weingarten L, Huber M, Palme K. 2008.** A cysteine-rich receptor-like kinase NCRK and a pathogen-induced protein kinase RBK1 are Rop GTPase interactors. *The Plant Journal*, **53**: 909-23.
- Moon SY, Zheng Y. 2003.** Rho GTPase-activating proteins in cell regulation. *Trends in Cell Biology*, **13**: 13-22.
- Mori IC, Murata Y, Yang Y, Munemasa S, Wang YF, Andreoli S, Tiriack H, Alonso JM, Harper JF, Ecker JR, Kwak JM, Schroeder JI. 2006.** CDPKs CPK6 and CPK3 function in ABA regulation of guard cell S-type anion- and Ca(2+)-permeable channels and stomatal closure. *PLoS Biology*, **4**: e327.
- Nagawa S, Xu T, Yang Z. 2010.** RHO GTPase in plants: Conservation and invention of regulators and effectors. *Small GTPases*, **1**: 78-88.
- Narumiya S, Thumkeo D. 2018.** Rho signaling research: history, current status and future directions. *FEBS Letters*, **592**: 1763-1776.
- Nibau C, Tao L, Lévassieur K, Wu HM, Cheung AY. 2013.** The Arabidopsis small GTPase AtRAC7/ROP9 is a modulator of auxin and abscisic acid signalling. *Journal of Experimental Botany*, **64**: 3425-37.
- Nibau C, Wu HM, Cheung AY. 2006.** RAC/ROP GTPases: 'hubs' for signal integration and diversification in plants. *Trends in Plant Science*, **11**: 309-15.
- Pfeffer SR. 2017.** Rab GTPases: master regulators that establish the secretory and endocytic pathways. *Molecular Biology of the Cell*, **28**: 712-715.
- Read S, Clarke A, Bacic A. 1993a.** Requirements for division of the generative nucleus in cultured pollen tubes of *Nicotiana*. *Protoplasma*, **174**: 101-115.
- Read S, Clarke AE, Bacic A. 1993b.** Stimulation of growth of cultured *Nicotiana tabacum* W38 pollen tubes by poly(ethylene glycol) and Cu(II) salts. *Protoplasma* **177**: 1-14.
- Rodriguez L, Gonzalez-Guzman M, Diaz M, Rodrigues A, Izquierdo-Garcia AC, Peirats-Llobet M, Fernandez MA, Antoni R, Fernandez D, Marquez JA, Mulet JM, Albert A, Rodriguez PL. 2014.** C2-domain abscisic acid-related proteins mediate the interaction of PYR/PYL/RCAR abscisic acid receptors with the plasma membrane and regulate abscisic acid sensitivity in Arabidopsis. *The Plant Cell*, **26**: 4802-20.
- Sambrook J, Russell D. 2001.** Molecular Cloning: A Laboratory Manual. Cold Spring Harbor, NY: Cold Spring Harbor Laboratory Press.
- Schaefer A, Miertzschke M, Berken A, Wittinghofer A. 2011.** Dimeric plant RhoGAPs are regulated by its CRIB effector motif to stimulate a sequential GTP hydrolysis. *Journal of Molecular Biology*, **411**: 808-22.
- Schepetilnikov M, Makarian J, Srour O, Geldreich A, Yang Z, Chicher J, Hammann P, Ryabova LA. 2017.** GTPase ROP2 binds and promotes activation of target of rapamycin, TOR, in response to auxin. *The EMBO Journal*, **36**: 886-903.
- Shichrur K, Yalovsky S. 2006.** Turning ON the switch--RhoGEFs in plants. *Trends in Plant Science*, **11**: 57-9.

- Son YS, Im CH, Kim DW, Bahk JD. 2013.** OsRab11 and OsGAP1 are essential for the vesicle trafficking of the vacuolar H(+)-ATPase OsVHA-a1 under high salinity conditions. *Plant Science*, **198**: 58-71.
- Sormo CG, Leiros I, Brembu T, Winge P, Os V, Bones AM. 2006.** The crystal structure of Arabidopsis thaliana RAC7/ROP9: the first RAS superfamily GTPase from the plant kingdom. *Phytochemistry*, **67**: 2332-40.
- Steinhorst L, Kudla J. 2013.** Calcium - a central regulator of pollen germination and tube growth. *Biochimica et Biophysica Acta*, **1833**: 1573-81.
- Stephan O, Cottier S, Fahlen S, Montes-Rodriguez A, Sun J, Eklund DM, Klahre U, Kost B. 2014.** RISAP is a TGN-associated RAC5 effector regulating membrane traffic during polar cell growth in tobacco. *The Plant Cell*, **26**: 4426-47.
- Stephan O, Koch C. 2009.** Sin3 is involved in cell size control at Start in *Saccharomyces cerevisiae*. *The FEBS Journal*, **276**: 3810-24.
- Stephan OOH. 2017.** Actin fringes of polar cell growth. *Journal of Experimental Botany*, **68**: 3303-3320.
- Takeuchi H, Higashiyama T. 2016.** Tip-localized receptors control pollen tube growth and LURE sensing in Arabidopsis. *Nature*, **531**: 245-8.
- Tao LZ, Cheung AY, Wu HM. 2002.** Plant Rac-like GTPases are activated by auxin and mediate auxin-responsive gene expression. *The Plant Cell*, **14**: 2745-60.
- Thompson G, Owen D, Chalk PA, Lowe PN. 1998.** Delineation of the Cdc42/Rac-binding domain of p21-activated kinase. *Biochemistry*, **37**: 7885-91.
- Vernoud V, Horton AC, Yang Z, Nielsen E. 2003.** Analysis of the small GTPase gene superfamily of Arabidopsis. *Plant Physiology*, **131**: 1191-208.
- Wang T, Liang L, Xue Y, Jia PF, Chen W, Zhang MX, Wang YC, Li HJ, Yang WC. 2016.** A receptor heteromer mediates the male perception of female attractants in plants. *Nature*, **531**: 241-4.
- Wennerberg K, Rossman KL, Der CJ. 2005.** The Ras superfamily at a glance. *Journal of Cell Science*, **118**: 843-6.
- Winge P, Brembu T, Bones AM. 1997.** Cloning and characterization of rac-like cDNAs from Arabidopsis thaliana. *Plant Molecular Biology*, **35**: 483-95.
- Winge P, Brembu T, Kristensen R, Bones AM. 2000.** Genetic structure and evolution of RAC-GTPases in Arabidopsis thaliana. *Genetics*, **156**: 1959-71.
- Wu G, Gu Y, Li S, Yang Z. 2001.** A genome-wide analysis of Arabidopsis Rop-interactive CRIB motif-containing proteins that act as Rop GTPase targets. *The Plant Cell*, **13**: 2841-56.
- Wu G, Li H, Yang Z. 2000.** Arabidopsis RopGAPs are a novel family of rho GTPase-activating proteins that require the Cdc42/Rac-interactive binding motif for rop-specific GTPase stimulation. *Plant Physiology*, **124**: 1625-36.
- Wu J, Qin Y, Zhao J. 2008.** Pollen tube growth is affected by exogenous hormones and correlated with hormone changes in styles in *Torenia fournieri* L. *Plant Growth Regulation*: 137-148.
- Xin Z, Zhao Y, Zheng ZL. 2005.** Transcriptome analysis reveals specific modulation of abscisic acid signaling by ROP10 small GTPase in Arabidopsis. *Plant Physiology*, **139**: 1350-65.
- Yang HQ, Jie YL, Liu LX, Tang WY, Yu MG. 2003.** Regulation of Abscisic Acid and its Biosynthesis Inhibitors on Pomegranate Pollen Germination and Tube Growth. *ISHS Acta Horticulturae* **620**.
- Yang X, Zhang Q, Zhao K, Luo Q, Bao S, Liu H, Men S. 2017.** The Arabidopsis GPR1 Gene Negatively Affects Pollen Germination, Pollen Tube Growth, and Gametophyte Senescence. *International Journal of Molecular Sciences*, **18**.
- Yang Z. 2002.** Small GTPases: versatile signaling switches in plants. *The Plant Cell*, **14 Suppl**: S375-88.
- Yu F, Qian L, Nibau C, Duan Q, Kita D, Levasseur K, Li X, Lu C, Li H, Hou C, Li L, Buchanan BB, Chen L, Cheung AY, Li D, Luan S. 2012.** FERONIA receptor kinase pathway suppresses abscisic acid signaling in Arabidopsis by activating ABI2 phosphatase. *Proceedings of the National Academy of Sciences U S A*, **109**: 14693-8.
- Zhang H, Dawe RK. 2011.** Mechanisms of plant spindle formation. *Chromosome Research*, **19**: 335-44.
- Zhao S, Wu Y, He Y, Wang Y, Xiao J, Li L, Wang Y, Chen X, Xiong W, Wu Y. 2015.** RopGEF2 is involved in ABA-suppression of seed germination and post-germination growth of Arabidopsis. *The Plant Journal*, **84**: 886-99.
- Zheng ZL, Nafisi M, Tam A, Li H, Crowell DN, Chary SN, Schroeder JI, Shen J, Yang Z. 2002.** Plasma membrane-associated ROP10 small GTPase is a specific negative regulator of abscisic acid responses in Arabidopsis. *The Plant Cell*, **14**: 2787-97.
- Zheng ZL, Yang Z. 2000.** The Rop GTPase: an emerging signaling switch in plants. *Plant Molecular Biology*, **44**: 1-9.
- Zhou Z, Shi H, Chen B, Zhang R, Huang S, Fu Y. 2015.** Arabidopsis RIC1 Severs Actin Filaments at the Apex to Regulate Pollen Tube Growth. *The Plant Cell*, **27**: 1140-61.
- Zhu SY, Yu XC, Wang XJ, Zhao R, Li Y, Fan RC, Shang Y, Du SY, Wang XF, Wu FQ, Xu YH, Zhang XY, Zhang DP. 2007.** Two calcium-dependent protein kinases, CPK4 and CPK11, regulate abscisic acid signal transduction in Arabidopsis. *The Plant Cell*, **19**: 3019-36.

## 8. FIGURE LEGENDS

### Figure 1. Domain Structure, Amino Acid Sequence Comparison, Tissue Specific Expression Levels, and Subcellular Localization of Tobacco Nt-RIC11pt.

(A) Domain structure of full-length Nt-RIC11pt protein (aa 1-144; top) and the N-terminal truncated version (aa 9-144) identified in the yeast two-hybrid screen as Nt-RAC5 interaction partner. S highlight the position of serine residues in Nt-RIC11pt predicted as potential phosphorylation sites via GPS3.0 software; Bold S and T highlight the serine and threonine residues consistently predicted by GPS3.0, NetPhos 3.1

(<http://www.cbs.dtu.dk/services/NetPhos/>), and KinasePhos (<http://kinasephos.mbc.nctu.edu.tw/>) software. Red box: CRIB-motif; Blue boxes: Serine residues homologous between Nt-RIC11pt and predicted Nt-RIC10(XP\_016467450); Green box: Serine residues conserved between Nt-RIC11pt and predicted Nt-RIC11 isoforms Nt-RIC11.1(XP\_016507046) and Nt-RIC11.2(XP\_016507047).

(B) Clustal Omega Amino Acid Sequence Alignment (<https://www.ebi.ac.uk/Tools/msa/clustalo/>) of Nt-RIC11pt with 7 predicted *Nicotiana tabacum* RICs identified by BLAST search. The tobacco <sub>pred</sub>Nt-RIC sequences were predicted by automated computational analysis of genomic sequences (HMM-based gene prediction program *Gnomon* ([https://www.ncbi.nlm.nih.gov/genome/annotation\\_euk/gnomon/](https://www.ncbi.nlm.nih.gov/genome/annotation_euk/gnomon/))). Black shading: sequence identity; Gray shading: sequence similarity; Red box: CRIB-motif; Blue boxes: Amino acid sequences specifically conserved between isolated Nt-RIC11pt and <sub>pred</sub>Nt-RIC10 (XP\_016467450); Green boxes: Amino acid sequences specifically conserved between isolated Nt-RIC11 and predicted <sub>pred</sub>Nt-RIC11 isoforms <sub>pred</sub>Nt-RIC11.1 (XP\_016507046) and <sub>pred</sub>Nt-RIC11.2 (XP\_016507047); Yellow box: Amino acids conserved between Nt-RIC11pt, predicted <sub>pred</sub>Nt-RIC10 and both predicted <sub>pred</sub>Nt-RIC11 isoforms; Black asterisks mark all serine residues in Nt-RIC11pt; Nt: *Nicotiana tabacum*.

(C) Semi-quantitative RT-PCR analysis of Nt-RIC11t mRNA levels in different wild-type tobacco tissues compared to mRNA levels of the Nt-LF25 reference gene. The mRNA was purified from different plant tissues and used as template for cDNA synthesis. Corresponding cDNA was analysed with gene specific primers via multiplex PCR and the amplified products were stained with ethidium bromide and analysed on a 2% agarose gel.

Pi: pistils; Ro: roots; Le: leaves; Fl: flowers; Pt: pollen tubes; Se: sepals; St: stems; Fb: flower buds; An: anthers; Pe: petals; Po: pollen.

(D) Nt-RIC11pt mRNA levels in different wild-type tobacco tissues analysed by quantitative reverse transcription real time polymerase chain reaction (qRT-PCR) assay using gene specific primers for Nt-RIC11pt and the Nt-LF25 reference gene (Materials and Methods). Displayed is the mean relative Nt-RIC11pt mRNA level of three biological replicates normalized to Nt-LF25 mRNA.

Pi: pistils; Ro: roots; Le: Leaves; Fl: flowers; Pt: pollen tubes; Se: sepals; St: stems; Fb: flower buds; An: anthers; Pe: petals; Po: pollen.

(E) Single confocal optical section through a normal growing pollen tube transiently expressing Nt-RIC11pt:YFP 6h after gene transfer. The Nt-RIC11pt fusion protein shows a clear cytoplasmic distribution pattern. Bar = 10  $\mu$ m.

## Figure 2. Comparison of Nt-RIC11pt with Closest Homologs from *Arabidopsis thaliana* and predicted *Nicotiana tabacum* RICs .

(A) Clustal Omega Amino Acid Sequence Alignment of Nt-RIC11pt with *Arabidopsis thaliana* At-RIC9 (AT1G61795.1), At-RIC10.1 (AT4G04900.1), At-RIC10.2 (AT4G04900.2), and At-RIC11 (AT4G21745) from TAIR database. Black shading: sequence identity; Gray shading: sequence similarity; Blue asterisks mark all serine residues conserved between Nt-RIC11pt, At-RIC9, At-RIC10, and At-RIC11; Red bar: highly conserved CRIB domain; Nt: *Nicotiana tabacum*; At: *Arabidopsis thaliana*.

(B) Statistical analysis of protein sequence identities of 18 known *Arabidopsis* RICs, 9 computer predicted tobacco RICs, and for comparison of 11 known *Arabidopsis* ROPs. Indicated are their respective mean sequence identities [%] and the standard deviation.

(C) Phylogenetic analysis delineated in an unrooted tree obtained by maximum likelihood estimation and JTT matrix-based model providing protein amino acid sequence relationships between Nt-RIC11pt, known At-RICs from *Arabidopsis thaliana*, and computer predicted Nt-RICs of *Nicotiana tabacum* from database search. All RICs were classified in V groups (various red tones) according to sequence similarity. Phylogeny reconstruction was generated using 'MEGA-X 10.0.5 - software'. The indicated bootstrap values are based on 500 replications and the scale bar for branch lengths indicates the number of amino acid substitutions per site. Locus/Accession number is given for every protein. At: *Arabidopsis thaliana*; Nt: *Nicotiana tabacum*.

## Figure 3. Domain Structure Comparison of all known *Arabidopsis* and predicted Tobacco RICs

(A) Clustal Omega Amino Acid Sequence Alignment of Nt-RIC11pt with all known *Arabidopsis* homologs and 7 predicted *Nicotiana tabacum* RICs identified by database search. The tobacco <sub>pred</sub>Nt-RIC Sequences were predicted by automated computational analysis of genomic sequences (HMM-based gene prediction program *Gnomon* ([https://www.ncbi.nlm.nih.gov/genome/annotation\\_euk/gnomon/](https://www.ncbi.nlm.nih.gov/genome/annotation_euk/gnomon/))). Indicated are the highly conserved consensus sequence and the conserved serine/threonine [ST] residue. Black shading: sequence identity; Gray shading: sequence similarity; At: *Arabidopsis thaliana*; Nt: *Nicotiana tabacum*.

(B) Protein domain structure comparison of Nt-RIC11pt with all known *Arabidopsis* At-RICs (white) and 7 predicted *Nicotiana tabacum* RICs (grey) identified by database search. RICs were classified in V groups according to sequence similarity. Black boxes: indicate the CRIB-domain, as well as the consensus sequence and the conserved serine/threonine residue in the K/R/S/T rich domain; pred.: predicted; aa: amino acid; At: *Arabidopsis thaliana*; Nt: *Nicotiana tabacum*.

## Figure 4. Interaction of Nt-RIC11pt with Constitutively Active, Dominant Negative as well as GDP- or GTP-Loaded Wild-type forms of RAC5 in Pull Down Assays and Yeast Two-Hybrid Assay.

(A) Yeast transformants co-expressing either wild-type (wt), or constitutive active (ca: G15V), or dominant-negative (dn: T20N) Nt-RAC5 fused to the DNA binding domain of the GAL4 transcription factor (GAL4-DBD) together with Nt-RIC11pt fused to the GAL4 activation domain (GAL4-AD). Cells from single yeast transformant colonies were diluted in water and equal amounts plated on histidine-free culture medium (-His) to analyse for two-hybrid interaction. As positive growth control all transformants were also plated on histidine containing medium (+His). Controls for specific protein interaction were transformants co-expressing the Nt-

RIC11pt prey protein with just the GAL4-DBD, as well as transformants co-expressing Nt-RAC5 bait protein together with just the GAL4-AD.

**(B)** Equal amounts of GST-tagged Nt-RIC11pt protein were immobilized on glutathione-coupled bead matrix, washed and purified from *E. coli* cell extracts. Matrix-bound GST:Nt-RIC11pt fusion protein was incubated with *in vitro* transcribed/translated myc:Nt-RAC5 (either wild type [wt], or constitutive active [ca], or dominant-negative [dn] versions of Nt-RAC5). Beads loaded with GST served as control. Precipitated GST:Nt-RIC11pt and co-purified myc-tagged Nt-RAC5 proteins were separated via SDS-PAGE and analysed by immunoblotting applying anti-GST antibodies (upper panel) and anti-myc antibodies (lower panel). Input panel on the left shows *in vitro* transcription/translation of myc:Nt-RAC5 fusion proteins, which were subsequently subjected to pull down assay. GST: Glutathione-S-Transferase affinity tag; Nt: *Nicotiana tabacum*.

**(C)** GST-tagged wild type Nt-RAC5 was purified from *E. coli* cell extracts via magnetic beads. The matrix-bound GST:Nt-RAC5 fusion proteins were either loaded with GDP $\beta$ S or GTP $\gamma$ S and then incubated with *in vitro*-transcribed/translated myc:Nt-RIC11pt. Beads loaded with GST served as control. Precipitated GST-tagged Nt-RAC5 and co-purified myc-tagged Nt-RIC11pt proteins were separated via SDS-PAGE and analysed by immunoblotting applying anti-GST antibodies (upper panel) and anti-myc antibodies (lower panel).

### **Figure 5. Interaction of Nt-RIC11pt with Nt-RAC3, Nt-RAC5, Nt-RAC5.2, and Nt-RAC1, in Pull Down and Yeast Two-Hybrid Assays.**

**(A)** GST-tagged Nt-RAC proteins (RAC1, RAC3, RAC5, RAC5.2) were immobilized on magnetic bead matrix, washed and purified from *E. coli* cell extracts. Each matrix-bound GST:Nt-RAC fusion protein was equally loaded with GTP $\gamma$ S and incubated with *in vitro*-transcribed/translated myc:Nt-RIC11pt. Beads loaded with GST served as control. Precipitated GST-tagged Nt-RACs and co-purified myc-tagged Nt-RIC11pt proteins were separated via SDS-PAGE and analysed by immunoblotting applying anti-GST antibodies (upper panel) and anti-myc antibodies (lower panel). Input panel on the left shows *in vitro* transcription/translation of myc:Nt-RIC11pt fusion proteins, which were subsequently subjected to pull down assay. GST: Glutathione-S-Transferase affinity tag.

**(B)** Statistical analysis of protein quantities purified in pull down experiment from (A). Displayed are mean values of the ratio representing myc:Nt-RIC11pt enrichment relative to precipitated GST:Nt-RAC. Co-precipitated myc:Nt-RIC11pt quantities were individually normalized to the myc:Nt-RIC11pt co-precipitate of the GST-background control beforehand. The signal intensities of chemoluminescence detection were determined by digital imaging and quantified by ImageJ software (<https://imagej.nih.gov/ij/>). The mean values are calculated from four independent pull down experiments and their standard error is indicated. Red columns: RAC/ROPs assigned to pollen tube growth; Green columns: RAC/ROPs assigned to ABA response pathway.

**(C)** Yeast transformants co-expressing either Nt-RAC5, Nt-RAC3, or Nt-RAC1 fused to the DNA binding domain of the GAL4 transcription factor (GAL4-DBD) together with Nt-RIC11pt fused to the GAL4 activation domain (GAL4-AD). Cells from yeast transformant single colonies were diluted in water and equal amounts plated on histidine-free culture medium (-His) to analyse for two-hybrid interaction. Equal amounts of all transformants were also plated on histidine containing medium (+His) as positive growth control. Controls for specific protein interaction were transformants co-expressing the Nt-RIC11pt prey protein with just the GAL4-DBD, as well as transformants co-expressing Nt-RAC5, Nt-RAC3, or Nt-RAC1 bait proteins together with just the GAL4-AD.

(D) Phylogenetic analysis presented as unrooted radial tree obtained by maximum likelihood estimation and JTT matrix-based model providing protein amino acid sequence relationships between known ROPs of *Arabidopsis thaliana*, and RAC1, RAC3, RAC5, as well as RAC5.2 of *Nicotiana tabacum*, which were analysed in pull down experiment from (A) and yeast two hybrid assay from (C). The phylogeny reconstruction was generated using 'MEGA-X 10.0.5 - software'. The indicated bootstrap values are based on 500 replications and the scale bar for branch lengths indicates the number of amino acid substitutions per site. At: *Arabidopsis thaliana*; Nt: *Nicotiana tabacum*; Red: RAC/ROPs assigned to pollen tube growth; Green: RAC/ROPs assigned to ABA response pathway.

### Figure 6. Yeast Two-Hybrid Assay, Amino Acid Sequence Alignment and Phylogenetic Analysis of the Nt-RIC11pt Interaction Partner Nt-CAR4.

(A) Clustal Omega Amino Acid Sequence Alignment of Nt-CAR4 with closest homologs from *Arabidopsis thaliana* (At), *Nicotiana tabacum* (Nt), *Nicotiana glauca* (Ng), and *Oryza sativa* (Os) identified by BLAST search. Black shading: sequence identity; Gray shading: sequence similarity; Blue box: C2-domain.

(B) Yeast transformants co-expressing Nt-RIC11pt fused to the DNA binding domain of the GAL4 transcription factor (GAL4-DBD) together with Nt-CAR4 fused to the GAL4 activation domain (GAL4-AD). Yeast single colonies were diluted in water and equal amounts of transformed cells plated on histidine-free culture medium (-His) to analyse for two-hybrid interaction. All transformants were also plated on histidine containing medium (+His) as positive growth control. Controls for specificity of the protein interaction were transformants co-expressing the Nt-CAR4 prey protein with just the GAL4-DBD, as well as transformants co-expressing Nt-RIC11pt bait protein together with just the GAL4-AD.

(C) Phylogenetic analysis delineated in an unrooted tree obtained by maximum likelihood estimation and JTT matrix-based model providing protein amino acid sequence relationships between Nt-CAR4 and closest homologs from *Arabidopsis thaliana* and *Nicotiana tabacum*. All members of the CAR-family were classified in V groups (various blue tones) according to their sequence similarity. Notice the remote clustering of Nt-CAR11 (blue) together with the ARF-GAPs AGD11-13 (green) in group V (blue to green shading). Phylogeny reconstruction was generated using 'MEGA-X 10.0.5 - software'. The indicated bootstrap values are based on 500 replications and the scale bar for branch lengths indicates the number of amino acid substitutions per site. Locus/Accession number is given for every protein. At: *Arabidopsis thaliana*; Nt: *Nicotiana tabacum*.

### Figure 7. Phylogenetic Comparison of the CAR/GAP-family with known Arf-GAPs, Rho/ROP-GAPs and Ypt/Rab-GAPs.

Phylogenetic analysis delineated in an unrooted tree obtained by maximum likelihood estimation and JTT matrix-based model providing protein amino acid sequence relationships between the CAR/GAP-family and known Arf-GAPs, Rho/ROP-GAPs and Ypt/Rab-GAPs. The CAR/GAP-family comprises known *Arabidopsis thaliana* proteins, Nt-CAR4pt, and computer predictions of *Nicotiana tabacum* from database search. Phylogeny reconstruction was generated using 'MEGA-X 10.0.5 - software'. The indicated bootstrap values are based on 500 replications and the scale bar for branch lengths indicates the number of amino acid substitutions per site. Locus/Accession number is given for every protein. At: *Arabidopsis thaliana*; Nt: *Nicotiana tabacum*.



### **Figure 8. Graphical Overview of RIC11 Interaction Network.**

Schematic view of the RIC11 interaction network, including different RACs and CAR4/GAP1. The connection RAC3-RIC11-CAR4/GAP1 provides a link to the related PYR/PYL-homodimer, thus establishing a role in ABA-response. Cytoplasmic RIC11 indirectly mediates GAP-activity to membrane-associated RAC3 by recruitment of the unusual membrane-bound CAR4/GAP1.  $\text{Ca}^{2+}$ -dependent membrane association of CAR4/GAP1 establishes a connection to the intracellular calcium gradient, which is a prerequisite for pollen tube growth. Solid arrows indicate steps supported by experimental data described in this paper and additional studies (Cheung et al., 2013; Cheung et al., 2008; Diaz et al., 2016; Rodriguez et al., 2014), whereas dotted arrows indicate implicated more putative relations based on other currently available data (Stephan et al., 2014).
